*Perioperative Cardiac Morbidity*

Dennis T. Mangano, Ph.D., M.D.\*

## CONTENTS

## THE PROBLEM

Cardiovascular disease in the United States  
The impact of cardiovascular disease on anesthesia and surgery  
The problem of perioperative cardiac morbidity  
Attempted solutions to the problem

## THE PREOPERATIVE PREDICTORS

Historical predictors  
Age  
Previous myocardial infarction  
Angina  
Congestive heart failure  
Hypertension  
Diabetes mellitus  
Dysrhythmias  
Peripheral vascular disease  
Valvular heart disease  
Cholesterol  
Cigarette smoking  
Previous CABG surgery  
Previous coronary angioplasty  
Cardiovascular therapy  
Risk indices

## Diagnostic Testing Predictors

Twelve-lead ECG  
Chest x-ray  
Exercise stress testing  
Ambulatory ECG monitoring

## Precordial echocardiography

Transesophageal echocardiography  
Radionuclear imaging  
Magnetic resonance imaging/spectroscopy  
Cardiac catheterization

## THE INTRAOPERATIVE PREDICTORS

Classical predictors  
Choice of anesthetic  
Site of surgery  
Duration of anesthesia and surgery  
Emergency surgery  
Dynamic predictors  
Hypertension  
Hypotension  
Tachycardia  
Myocardial ischemia  
ECG ST abnormalities  
TEE wall-motion/thickening abnormalities  
Pulmonary artery monitoring of ischemia  
Radionuclear imaging of ischemia  
Cardiokymographic detection of ischemia  
Biochemical markers of ischemia  
Ventricular dysfunction  
Dysrhythmias

## THE POSTOPERATIVE PREDICTORS

## CONCLUSIONS

**The Problem****CARDIOVASCULAR DISEASE IN THE UNITED STATES**

CARDIOVASCULAR DISEASE is a major health-care problem in the United States, affecting one in four Americans

\* Professor and Vice Chairman, Anesthesia.

Received from the Department of Anesthesia, University of California, San Francisco, and the Department of Veterans Affairs Medical Center, San Francisco, California. Accepted for publication July 26, 1989. Supported by a grant from the National Institutes of Health (RO1-HL36744).

Address reprint requests to Dr. Mangano: Department of Anesthesia (129), Veterans Affairs Medical Center, 4150 Clement Street, San Francisco, California 94121.

Key words: Anesthesia, cardiac: cardiovascular disease; coronary artery disease; perioperative cardiac morbidity; perioperative complications; perioperative myocardial infarction; perioperative myocardial ischemia. Outcome, cardiac: perioperative outcome predictors.

(65/239 million).<sup>1,2,†</sup> The annual mortality rate for cardiovascular disease is 1 million, which exceeds that of all other diseases combined and accounts for one of every two deaths in the United States (fig. 1). Annual morbidity exceeds 2.5 million: 1.5 million myocardial infarctions (MI), 0.6 million strokes, and 0.4 million cases of congestive heart failure (CHF). Total morbidity and mortality costs per year surpass \$83 billion.<sup>3</sup>

Although hypertension is the most prevalent form of cardiovascular disease (59.1 million), coronary artery disease (6.7 million) causes the highest morbidity (MI, CHF) and mortality (541,000 deaths annually) (figs. 2 A-C).<sup>1</sup> Consequently, the diagnostic testing of patients with coronary artery disease (CAD) has increased substantially

† American Heart Association. 1989 Heart Facts. American Heart Association, Dallas, 1989.

## ANNUAL CARDIOVASCULAR DISEASE STATISTICS

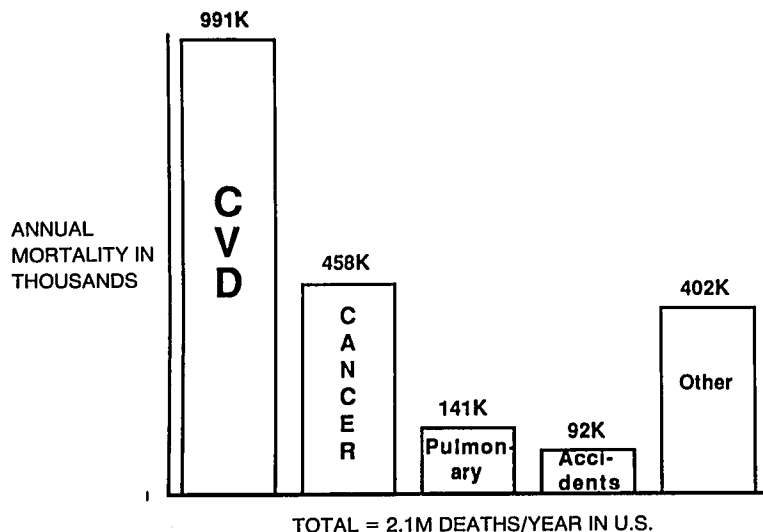

FIG. 1. U. S. annual mortality statistics. (Source: National Center for Health Statistics, U. S. Public Health Service, Department of Health and Human Services, [1988].)

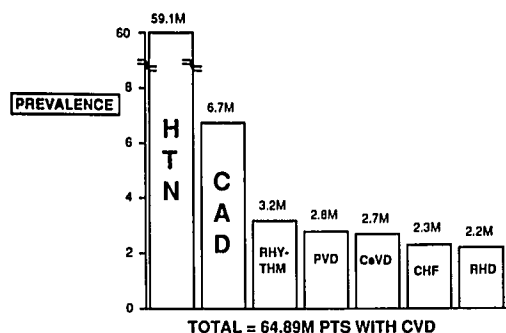

A

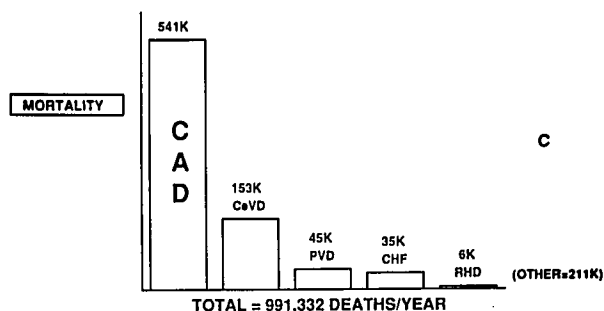

C

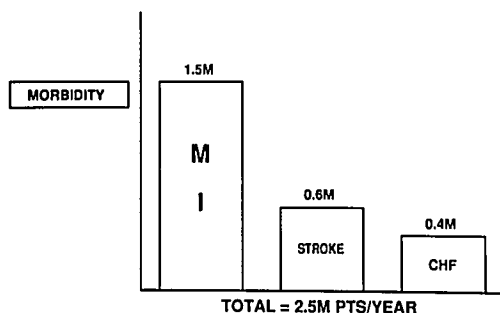

B

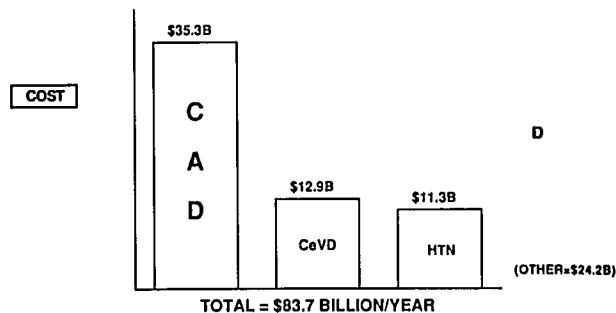

D

FIG. 2. U. S. annual cardiovascular disease (CVD) statistics. (Sources: National Center for Health Statistics, U. S. Public Health Service, Department of Health and Human Services [1988], and estimates by the American Heart Association [1988] and National Heart, Lung, and Blood Institute [1988].) *A* (top left) Prevalence of CVDs in the U. S. HTN = hypertension; CAD = coronary artery disease; Rhythm = heart rhythm disorder; PVD = peripheral vascular disease; CeVD = cerebrovascular disease; CHF = congestive heart failure; RHD = rheumatic heart disease. The total of the individual estimates exceeds 64,890,000, since many people have more than one cardiovascular disorder. *B* (bottom left) Annual number of first and recurrent morbid cardiovascular events in the U. S. (1988). MI = myocardial infarction. *C* (top right) The annual U. S. mortality associated with individual CVDs (1988). *D* (bottom right) Estimated costs associated with the three most costly CVDs in the U. S. (1988).

(>850,000 cardiac catheterizations annually), as has the use of pharmacologic therapies (nitrates,  $\beta$ -blockers, calcium-channel blockers) and antithrombotic therapies (streptokinase, tissue plasminogen activator). The number of angioplasties has increased dramatically to 300,000 per yr, surpassing the number of coronary artery bypass graft (CABG) surgeries (285,000 per yr). The annual cost of CAD-related care exceeds \$35 billion (fig. 2 D).

Cardiovascular disease will continue to be a major health-care problem. The prevalence of cardiovascular disease increases with age, and the population of the United States is aging rapidly. Twenty-five million people (10%) are now over the age of 65, including 2.7 million older than 85.<sup>2,4</sup> By the middle of the next century, the population over 65 is expected to increase to 66 million, many of whom are likely to have cardiovascular disease (fig. 3). Although we have reduced cardiovascular disease death rates by 20–30%, the predominant influence of aging will offset this decreased mortality by increasing the incidence of cardiovascular disease.<sup>2,3,5,6</sup> An example of such projections for CAD is given in table 1. Additionally, we have recently discovered a population of 2–5 million with a subclinical form of CAD known as silent myocardial ischemia, indicating that our current statistics for CAD (6.7 million) may underestimate its prevalence in the general population.<sup>7,8</sup> The prognosis for silent ischemia appears to be similar to that for clinically manifest CAD,<sup>9,10</sup> suggesting that it too will contribute to cardiovascular disease morbidity and mortality.

#### THE IMPACT OF CARDIOVASCULAR DISEASE ON ANESTHESIA AND SURGERY

The prevalence of cardiovascular disease substantially affects both cardiac and noncardiac surgery. It has doubled the annual number of cardiac surgeries to 400,000 (including 285,000 CABG surgeries and 48,000 valve re-

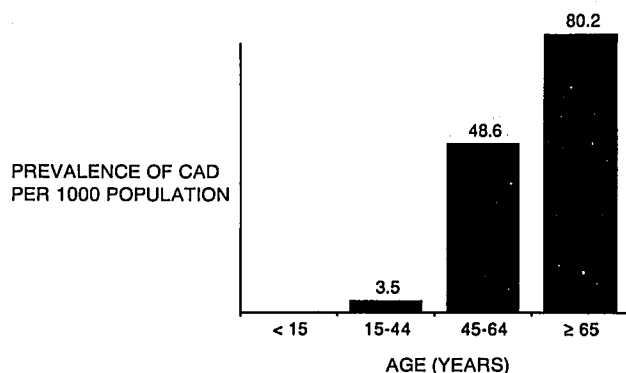

FIG. 3. Prevalence of CAD in four age groups in the U. S. (Sources: National Center for Health Statistics, U. S. Public Health Service, Department of Health and Human Services [1988], and estimates by the American Heart Association [1988] and National Heart, Lung, and Blood Institute [1988].)

TABLE 1. Coronary Artery Disease: Incidence, Prevalence, Mortality, and Cost Projections

| Year | Incidence | Prevalence | Mortality | Cost* |
|------|-----------|------------|-----------|-------|
| 1980 | 692,117   | 5,977,405  | 432,613   | 31.9  |
| 1985 | 729,235   | 6,700,639  | 486,428   | 35.3  |
| 1990 | 759,583   | 7,230,904  | 540,557   | 37.8  |
| 1995 | 792,006   | 7,625,001  | 567,798   | 39.9  |
| 2000 | 834,522   | 7,973,869  | 596,777   | 42.0  |
| 2005 | 888,438   | 8,385,046  | 608,434   | 44.4  |
| 2010 | 953,750   | 8,939,816  | 632,304   | 47.4  |

\* Billions in 1980 dollars. Source: Reference 3.

placements),<sup>5</sup> and increased the annual cost of cardiac surgical care to more than \$5 billion.<sup>3</sup> Despite the introduction of angioplasty and laser surgery, the number of cardiac surgeries will increase as prevalence increases.

The impact of cardiovascular disease on noncardiac surgical patients is even greater, and will be the focus of this review. In 1988, more than 25 million patients required noncardiac surgery versus 400,000 cardiac surgeries.<sup>5</sup> The noncardiac surgical patients at risk for cardiac morbidity or mortality number close to 7–8 million annually (fig. 4): approximately 1 million people have diagnosed CAD (classical angina, Q-waves on preoperative electrocardiogram [ECG]), 2–3 million two or more major risk factors for CAD, and 4 million are over the age of 65.‡ Moreover, 25% of the noncardiac surgical population require major intra-abdominal, thoracic, vascular, neurologic, or orthopedic procedures that further stress existing cardiac risk factors. For example, 40–70% of patients undergoing major vascular surgery without clinically evident CAD have angiographically demonstrable coronary stenoses.<sup>11,12</sup>

The future impact of cardiovascular disease on anesthesia and surgery is likely to be substantial given that the largest number of operations and the greatest length of stay now occur in the over-65 age group (figs. 5 A,B). Over the next 30 yr the number of noncardiac surgical procedures will increase by 50% (to 38 million),<sup>13</sup> as the percentage of surgical patients over 65 increases from 25 to 35%. The total number of older noncardiac surgical patients in whom cardiovascular disease is prevalent will thus double from 6 million to 12 million, thereby increasing the number of noncardiac surgical patients at risk for adverse cardiac outcome.

#### THE PROBLEM OF PERIOPERATIVE CARDIAC MORBIDITY

Does the prevalence of cardiovascular disease in noncardiac surgical patients increase perioperative compli-

‡ Six million surgical patients are older than age 65. This group represents 25% of the surgical population, which is a substantially higher prevalence than in the general population, in which 10% are older than age 65.<sup>5</sup>

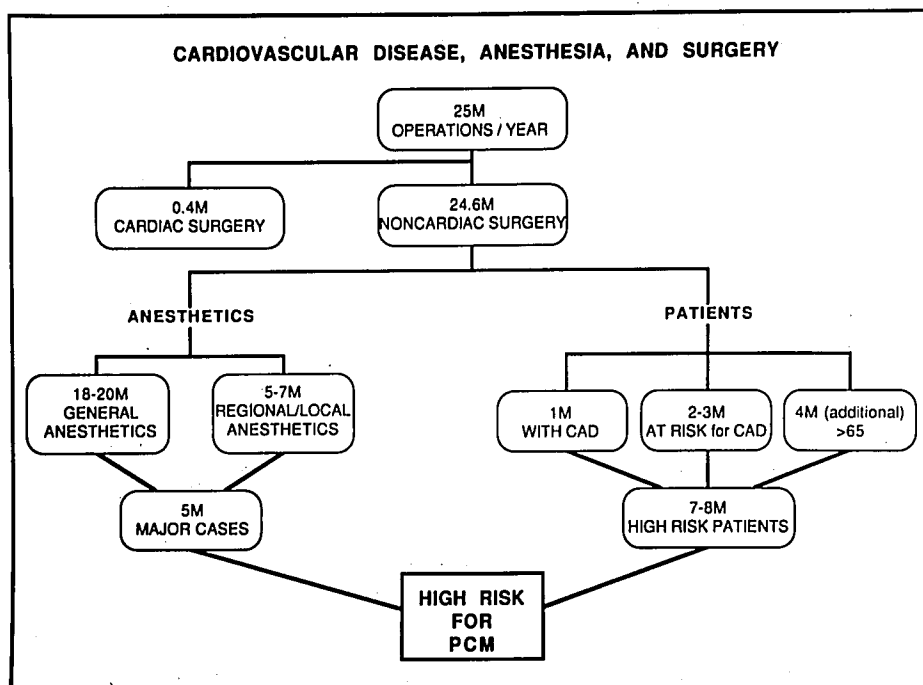

FIG. 4. Estimates of the numbers of surgeries and anesthetics, and the patients at risk for perioperative cardiac morbidity in the U. S. (1988). A total of 6 million (30%) surgical patients are over the age of 65. Two million of these are included in the CAD and at risk for CAD groups, resulting in the 4 million > age 65 (and the 7–8 million total) shown in the figure and in the text. (Sources: National Center for Health Statistics, U. S. Public Health Service, Department of Health and Human Services [1988]; the American College of Surgeons; and the American Society of Anesthesiologists.)

cations? Is perioperative cardiac morbidity (PCM) a problem in patients undergoing noncardiac surgery?

PCM is the leading cause of death following anesthesia and surgery. It is generally defined as the occurrence of MI, unstable angina, CHF, serious dysrhythmia, or cardiac death during the intraoperative or in-hospital postoperative periods.

However, assessment of PCM is difficult. For example, symptomatic transmural MIs can be detected by daily histories, ECGs, and cardiac enzyme levels, but most postoperative MIs are silent and many are subendocardial,<sup>14–25</sup> requiring the use of more sensitive detection techniques, such as radionuclear imaging. Even then, smaller subendocardial infarcts (<5 g) may not be perceived. Similarly, the detection of serious dysrhythmias requires the use of continuous postoperative ECG (Holter or real-time) monitoring, as well as continuous preoperative monitoring, to distinguish new from chronic dysrhythmias.<sup>26</sup> Diagnosis of postoperative CHF is complicated because postoperative pulmonary congestion may be precipitated not only by heart failure, but also by decreased osmotic pressure or pulmonary capillary leak due to pre-existing pulmonary disease, sepsis, or over-transfusion. The presence of such conditions would necessitate the use of sensitive techniques for assessing ventricular function (radionuclear, echocardiographic). Thus, accurate detection of adverse cardiac outcomes following noncardiac surgery is difficult, and it is not surprising that reported outcome rates vary markedly.

What outcome data exist for PCM? The outcome data available are accumulated from approximately 100 studies

spanning 35 yr. Most of the early studies were retrospective, whereas recent studies are prospective, focusing primarily on the outcomes of MI or cardiac death. Outcome data for unstable angina, CHF, or serious dysrhythmias are few. The available information is summarized in the following section (and table 2); myocardial ischemia, though not an outcome *per se*, is included for completeness.

**Myocardial Ischemia.**§ Intraoperative myocardial ischemia, diagnosed by ECG, transesophageal echocardiography (TEE), cardiokymography, or lactate changes, occurs in 18 to 74% of patients with CAD undergoing noncardiac surgery.<sup>27–38,42</sup> ECG studies suggest that ST changes most commonly occur in the lateral leads (V<sub>4</sub>, V<sub>5</sub>), and have a variable duration (1–258 min).<sup>27</sup> The segmental wall-motion and thickening changes detected by TEE or cardiokymography<sup>32,37–42</sup> are more sensitive indicators of ischemia than ECG ST-segment changes, but other characteristics of wall-motion changes, such as their location and duration, are unknown.

Intraoperative ischemia can be precipitated by increases in myocardial oxygen demand caused by tachycardia, hypertension, anemia, stress, sympathomimetic drugs, or

§ The term "ischemia" is used throughout this text. However, both nonischemic and ischemic etiologies can exist for the ECG, TEE, cardiokymographic, and pulmonary capillary wedge pressure changes. It is difficult to distinguish among these etiologies since no absolute reference standard for ischemia exists and, even if available, would be difficult to apply perioperatively. Thus, "ECG ischemia" in this review should be interpreted as "ECG changes that may be consistent with ischemia," and similarly for the other techniques.

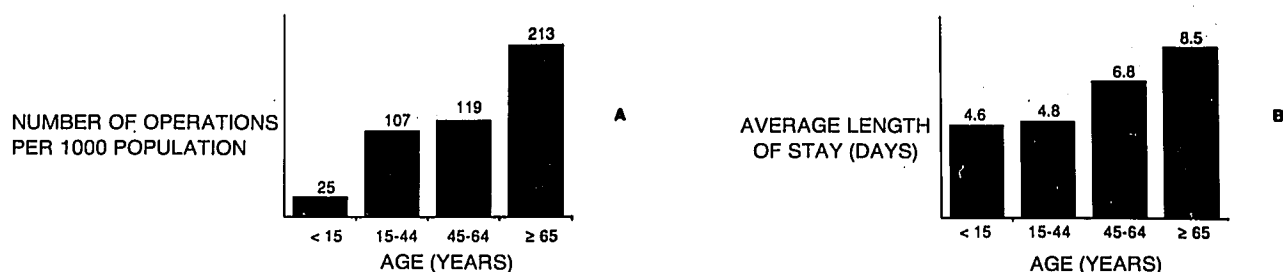

FIG. 5 A (left) Number of operations in the U. S., per 1000 population, in four age groups. B (right) Average length of stay following surgery in the U. S. in four age groups. (Sources: National Center for Health Statistics, U. S. Public Health Service, Department of Health and Human Services [1988]; the American College of Surgeons; and the American Society of Anesthesiologists.)

discontinuation of  $\beta$  blockers. However, as many as 50% or more of the ischemic episodes may be unrelated to the indices of oxygen demand, suggesting decreased oxygen supply as the primary cause.<sup>27-38,42</sup> Potential etiologies for decreased supply include external factors, such as hypotension, tachycardia, increased filling pressures, anemia, or hypoxemia. In addition, internal factors like acute coronary artery thrombosis and spasm also may play a role,<sup>43-46</sup> although no data are available for determining their importance in the perioperative setting. Finally, the relationship of intraoperative ECG, TEE, or cardiokymographic changes to outcome has not been investigated in patients undergoing noncardiac surgery.

Little is known about the postoperative period. However, recent preliminary studies suggest that the incidence of postoperative myocardial ischemia may be much higher than that of intraoperative or preoperative baseline ischemia.<sup>33,47</sup> These studies also suggest that postoperative episodes are generally silent, can occur as late as 7 days (or more) after surgery, and may be associated with a chronically elevated heart rate. Other potential causes of postoperative ischemia include alterations in oxygen supply due to external factors, or acute thrombosis and/or spasm. However, the role and relative importance of such factors remain unknown, as does the relationship of postoperative myocardial ischemia to outcome.

**Myocardial Infarction.** The incidence of MI after noncardiac surgery in the general population is 0.0–0.7%.<sup>17,48,49</sup> A perioperative infarction rate of 1.1% has been reported in patients with CAD,<sup>50</sup> and a (nonfatal) infarction rate of 1.8% in patients over 40 yr with or without CAD.<sup>16</sup> Reinfarction rates ranging from 5 to 8%<sup>17,51-53</sup> have been reported for patients with prior infarction, rates of 1–15%<sup>11,16,19,54-65</sup> for those who have had vascular surgery, and rates of up to 37%<sup>17,22,51-53</sup> for those with recent MI (table 2). However, the rates attained in patients with prior infarction have been challenged by Rao *et al.*,<sup>15</sup> who found an overall reinfarction rate of only 1.9%, increasing to only 5.7% when the previous infarction was recent (<3 months). Aggressive intraoperative monitoring and extended stay in an intensive care

unit (ICU) were used in Rao's study group; however, the beneficial effect of such monitoring and treatment modalities has not been confirmed.

Few characteristics of perioperative MIs are known. Most perioperative MI seems to occur postoperatively and silently,<sup>14-25</sup> making them difficult to detect and precise onset difficult to determine. A number of factors may be responsible for the silent nature of perioperative MI, including altered pain perception due to residual anesthetic effects, administration of analgesics, or competing somatic stimuli (such as incisional pain). As with silent ischemia, the mechanism is still uncertain. The etiology of perioperative MI is also uncertain, and little information is available. There are, however, a number of proposed hypotheses for the etiology of MI and the other acute ischemic syndromes—unstable angina and sudden ischemic death.<sup>44-46,66,67</sup> It appears that these syndromes may share the same pathophysiology and represent a continuum of change involving atherosclerotic plaque rupture, intraluminal thrombosis, and coronary arterial wall spasm. With progressive atherosclerosis, the raised coronary artery lesion causes local blood flow disturbances, producing

TABLE 2. Estimated Incidence of Perioperative Cardiac Morbidity (Noncardiac Surgery)

| Outcome                  | Incidence | References             |
|--------------------------|-----------|------------------------|
| Myocardial ischemia      |           |                        |
| Preoperative             | 24%       | 33                     |
| Intraoperative           | 18–74%    | 27–38, 42              |
| Postoperative            | 27–38%    | 33, 47                 |
| Myocardial infarction    |           |                        |
| General population       | 0.1–0.7%  | 17, 48, 49             |
| Prior MI                 | 1.9–7.7%  | 15, 17, 22, 51, 52, 53 |
| Vascular surgery         | 1–15%     | 11, 16, 19, 54–65      |
| Recent MI                | 0–37%     | 15, 17, 22, 51–53, 127 |
| Unstable angina          | unknown   |                        |
| Congestive heart failure |           |                        |
| Intraoperative           | 4.8%      | 15                     |
| Postoperative            | 3.6%      | 16                     |
| Serious dysrhythmias     |           |                        |
| Intraoperative           | 0.9–36%   | 92–94                  |
| Postoperative            | 14–40.5%  | 94                     |
| Cardiac death with PMI   | 36–70%    | 14, 48                 |

shear stresses on the delicate fibrous cap of the lesion. Plaque rupture ensues and precipitates intimal hemorrhage into the plaque and, more importantly, luminal thrombosis with platelet aggregation and adhesion. Powerful biochemical mediators are released from: 1) the aggregating platelets, including vasoactive thromboxane and serotonin;<sup>45,68-71</sup> 2) infiltrating leukocytes, including free radicals and chemo-attractant and coronary constrictor leukotrienes;<sup>72-74</sup> and 3) abnormal arachidonic acid metabolism, including prostacyclins, prostaglandins, and other platelet proaggregants.<sup>73,75</sup> As a result, thrombosis rapidly progresses and vasospasm is exacerbated. The thrombosis assumes a dynamic and unstable nature. Fibrinolysis, recanalization, and peripheral embolization precipitate cyclic reduction in coronary flow and distal perfusion pressure, manifested by unstable symptoms. Eventually, complete occlusion occurs, resulting in transmural MI and, when extensive or associated with dysrhythmia, sudden ischemic death. In the perioperative period, a number of factors may exacerbate this process and precipitate acute MI, including: 1) increased coronary artery shear stresses due to alterations in contractility, blood pressure, coronary flow, and coronary tone;<sup>43,44,46,76</sup> 2) enhanced platelet aggregation due to increased catecholamines, changes in blood viscosity and coronary flow, and abnormal hemostasis;<sup>68-70,76-83</sup> and 3) precipitation of vasospasm by release of humoral mediators during stress.<sup>43-46,66,67,84</sup> However, few data are available, and the role of these factors in the perioperative period is undetermined.

**Unstable Angina.** Although the incidence of unstable angina following noncardiac surgery is unknown, data are available on the incidence of stable angina. In 1,600 Coronary Artery Surgery Study registry patients, Foster *et al.*<sup>50</sup> reported an 8.7% incidence of postoperative chest pain in patients with CAD undergoing noncardiac surgery versus 4.5% in patients without CAD, and 5.1% in those with previous CABG ( $P = 0.004$ ). However, the incidence of ischemia may be substantially higher because of its silent nature. Recent studies suggest that in patients with or at risk for CAD, the incidence of postoperative ECG ST changes may be as high as 38%, with more than 85% of the episodes being silent.<sup>33,47</sup>

As discussed earlier, unstable angina (or ischemia) may reflect cyclic coronary obstruction produced by an unstable thrombus associated with varying degrees of vasospasm. A number of perioperative factors can exacerbate this cyclic obstruction, including the catecholamine, hemodynamic, and rheologic stresses already cited. Unfortunately, little information is available.

**Congestive Heart Failure.** Two large-scale studies have investigated CHF in noncardiac surgical patients<sup>15,16</sup> and suggest that the incidence of perioperative CHF is not insignificant in at-risk patients. Rao *et al.*<sup>15</sup> found a 4.8%

(29/609) incidence of intraoperative CHF (pulmonary capillary wedge pressure [PCWP] > 25 mmHg) in patients with previous MI, and Goldman *et al.*<sup>16</sup> found a 3.6% incidence of postoperative CHF in patients older than 40 with or without CAD. Several etiologic factors may play a role. In patients with CAD, isolated regional ischemia (producing papillary muscle dysfunction), global ischemia, or infarction may impair diastolic relaxation and systolic contraction, and precipitate CHF. The underlying pathophysiologic mechanisms include: 1) decreased actinomycin-ATPase activity and reduction of high-energy phosphates; 2) decreased synthesis of and intramyocardial depletion of norepinephrine; and 3) decreased function of the sarcoplasmic reticulum, with accumulation of intracellular calcium.<sup>85-89</sup> In addition, perioperative increases in afterload or preload (secondary to catecholamine, temperature, fluid shift, or respiratory changes) will mechanically affect both diastolic and systolic function, and exacerbate CHF.<sup>90,91</sup> The presence of cardiomyopathy (dilated or obstructive) or valvular heart disease may also contribute. The relative contribution of these ischemic and mechanical effects remains uncertain, since few perioperative studies have used sufficiently sensitive detection techniques allowing discrimination.

**Serious Dysrhythmias.** Although a number of studies have addressed the incidence and characteristics of intraoperative dysrhythmias,<sup>92</sup> only a few have used continuous recording techniques<sup>93,94</sup> and none have studied postoperative dysrhythmias in conjunction with the preoperative baseline pattern. The reported incidence of intraoperative dysrhythmias ranges from 13 to 84%, with ventricular dysrhythmias ranging from 3 to 60%.<sup>93-95</sup> The incidence of serious dysrhythmias (*e.g.*, persistent multifocal premature ventricular contractions, ventricular tachycardia, ventricular fibrillation) has been reported to range between 0.9%<sup>95</sup> and 6.0%.<sup>93</sup> During recovery from anesthesia, Bertrand *et al.*<sup>94</sup> reported a 48% incidence of dysrhythmias, with 28% ventricular. However, it is unclear whether these were new dysrhythmias or a recapitulation of the preoperative pattern. Furthermore, the relationship of perioperative serious dysrhythmias to ischemia or to other in-hospital or long-term adverse cardiac outcomes is unknown.

**Cardiac Death.** In patients without CAD, Foster *et al.*<sup>50</sup> reported a 0.5% cardiac mortality rate versus 2.4% in patients with CAD. In patients over 40 yr of age, with or without CAD, Goldman *et al.*<sup>16</sup> reported a rate of 1.9%. The mortality rate associated with perioperative MI ranges from 36 to 70%.<sup>14,48</sup> Mortality rates associated with other cardiac outcomes are unknown.

In summary, PCM is the primary cause of death following anesthesia and surgery, but many of its characteristics are unknown. Approximately 50,000 patients per yr sustain a perioperative MI and 20,000 of these die.

The cost of an in-hospital MI is approximately \$12,000,<sup>96</sup> resulting in health-care costs of hundreds of millions of dollars for perioperative MI alone.

#### ATTEMPTED SOLUTIONS TO THE PROBLEM

The problem of PCM is analogous to that faced by CAD investigators in the 1950s: only when predictors of CAD were identified (in studies such as that in Framingham) could rational approaches to prevention and treatment be developed to reduce morbidity.<sup>97</sup> Similarly, although perioperative MI was first identified as a problem in 1952,<sup>98</sup> but a decade passed before investigators attempted to determine the predictors of infarction (fig. 6). As a result, between 1961 and 1976, investigators, including those from the Mayo Clinic, identified historical preoperative predictors of PCM, readily obtainable from the routine history and physical examination.<sup>17-20,51,52,99,100</sup> However, multiple study designs (retrospective *vs.* prospective) and analyses (univariate *vs.* multivariate) were used, leading to controversial

results. Most predictors had as many studies supporting as refuting their prognostic value. Only one predictor, recent MI, was consistently identified, resulting in the commonly accepted practice of delaying surgery 6 months after an MI. In 1977, the first multifactorial approach was designed by Goldman *et al.*<sup>16</sup> who assigned a relative value to a series of preoperative predictors and developed a cardiac risk index. Although several studies have challenged the usefulness of this index,<sup>54,101,102</sup> the importance of this study remains unquestioned. In 1983, using an assertive approach to perioperative monitoring and therapy, Rao *et al.*<sup>15</sup> demonstrated substantially improved reinfarction statistics; however, independent studies confirming their findings have not been performed.

In 1984, the first of a series of studies addressed the prognostic value of specialized preoperative cardiac testing. Exercise stress testing<sup>21,103-105</sup> and radionuclear<sup>102,106,107</sup> and dipyridamole thallium imaging<sup>55,108-111</sup> were evaluated over the next 5 yr, and advocated for use in patients undergoing noncardiac surgery. The results, however, are preliminary.

FIG. 6. Chronology of the most important findings of outcome studies assessing perioperative cardiac morbidity.

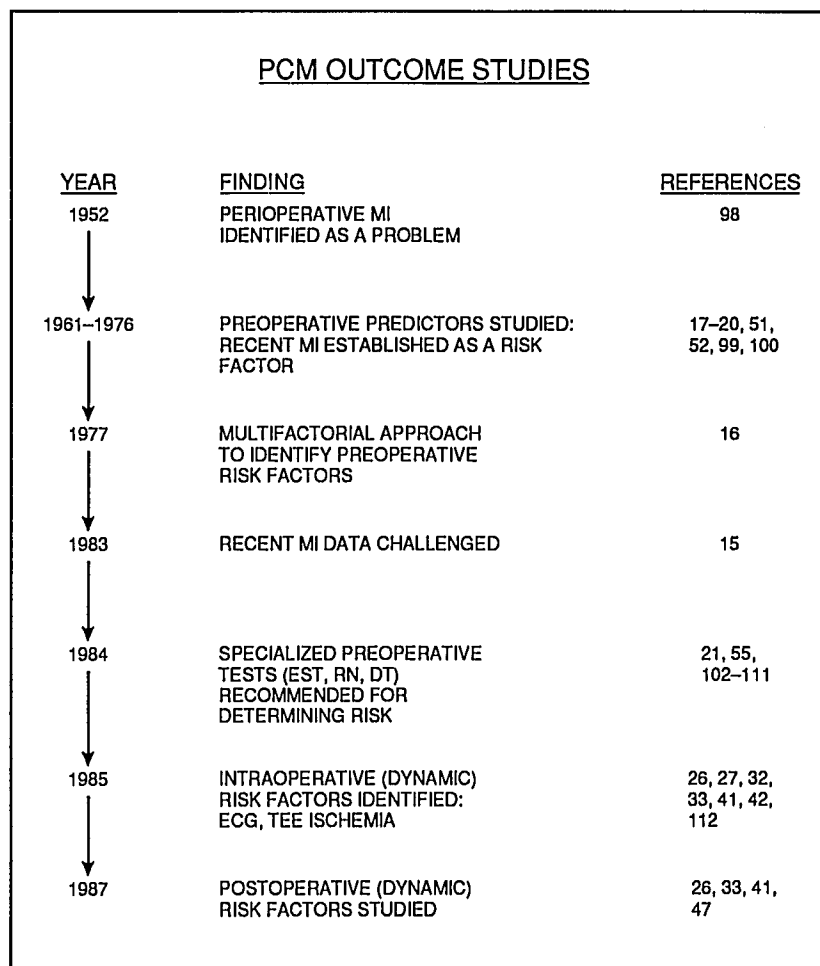

In 1985, an important series of studies emerged.<sup>26,27,32,33,41,42,112</sup> Until that time, outcome studies were attempting to solve the problem of PCM by identifying the preoperative predictors. Implicit in this approach was that the preoperative chronic disease state of the patient was primarily responsible for PCM. However, the entire perioperative period is dynamic. Intraoperative and postoperative alterations in hemodynamics, catecholamines, and the ischemic state may be equally important determinants of PCM. Outcome studies since then have emphasized this by focusing on the intraoperative "dynamic" predictors of PCM, particularly myocardial ischemia. The results of Slogoff and Keats<sup>112</sup> and Smith *et al.*<sup>32</sup> demonstrate the importance of intraoperative ischemia, at least in patients undergoing CABG surgery. Furthermore, recent studies in these patients suggest that the postbypass and postoperative periods may be equally or more important.<sup>26,41</sup> However, only preliminary evidence now documents the importance of perioperative myocardial ischemia in patients undergoing noncardiac surgery.<sup>27,33,42,47</sup>

The controversies surrounding the predictors of PCM in noncardiac surgical patients have resulted in a number of diagnostic and therapeutic dilemmas (fig. 7). Each of the three perioperative periods is associated with challenging and important questions. Preoperatively, should we delay surgery 6 months after recent MI, or can we infer from Rao *et al.*'s study<sup>15</sup> that delay may no longer be necessary? Should the cardiac risk index suggested by Goldman *et al.*<sup>16</sup> be used routinely to identify high-risk patients? Or, should nonroutine specialized tests, such as

dipyridamole thallium imaging, be used in patients undergoing major vascular procedures<sup>55,108,109</sup> or in high-risk subsets of these patients?<sup>110</sup> Intraoperatively, in which patients should we use multiple-lead ECG,<sup>27</sup> pulmonary artery monitoring,<sup>113</sup> or TEE?<sup>32</sup> Is choice of anesthetic agent or technique crucial?<sup>114</sup> Should isoflurane be avoided in patients with CAD<sup>29,115-118</sup> or in those who are prone to coronary steal?<sup>119</sup> Postoperatively, does prolonged ICU monitoring result in lower cardiac morbidity?<sup>15</sup> If so, which patients should be monitored and for how long?<sup>47</sup> Finally, what are the cost implications of such perioperative monitoring and therapeutic decisions in our present environment of health-care cost containment? We will address these challenging questions by reviewing the results of the perioperative outcome studies, and identifying the preoperative, intraoperative, and postoperative predictors of PCM.

### The Preoperative Predictors

The preoperative period has been the most extensively studied for potential historical and diagnostic test predictors of outcome in patients undergoing noncardiac surgery (table 3). Several of these, such as recent MI and current CHF, are established predictors that identify the highest-risk patients. Most, however, remain controversial. Each will be discussed, beginning with historical predictors, followed by those derived from diagnostic (routine and nonroutine) testing.

Before proceeding, it should be noted that the studies cited and compared in this review have been performed

### CURRENT DIAGNOSTIC AND THERAPEUTIC DILEMMAS

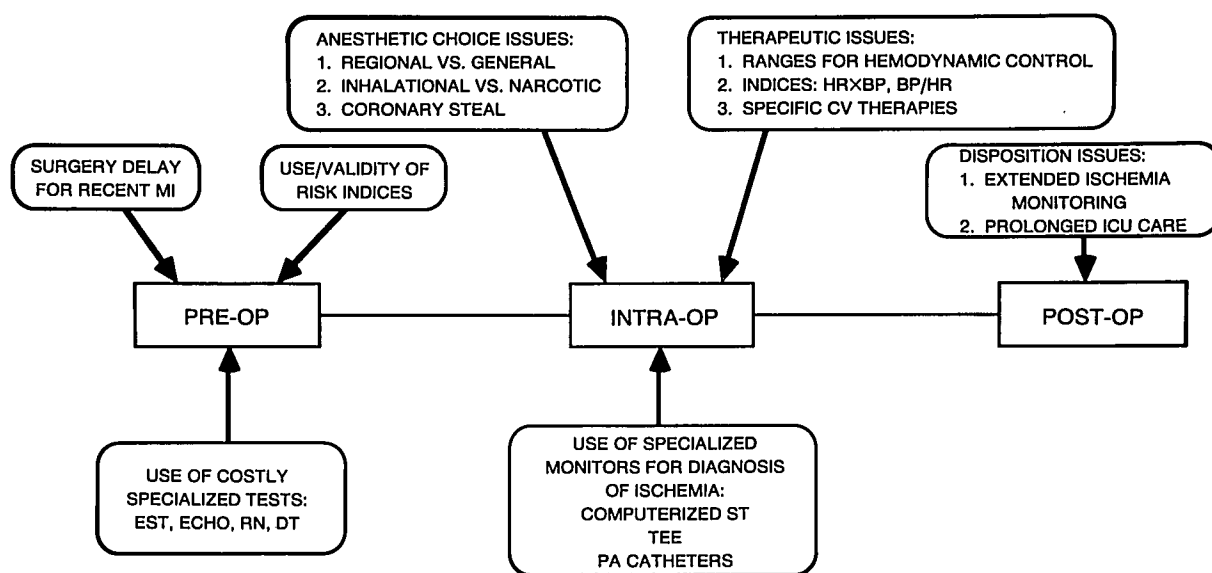

FIG. 7. Cardiovascular tests, procedures, and care regimen dilemmas and controversies for the three perioperative periods.



over a period spanning 35 yr. Thus, they differ in a number of ways, including study design, methodology, and analysis. Study design differences include: 1) observational<sup>15-20,51,52,99,100</sup> versus interventional;<sup>120-123</sup> 2) cross-sectional<sup>111,124,125</sup> versus longitudinal;<sup>15,16,50,62,63</sup> and 3) retrospective<sup>17,18,22,51,126</sup> versus prospective.<sup>15,16,19,20,52,53</sup> Methodologic differences include: 1) study population size—large-scale<sup>15-17,22,50</sup> versus small-scale;<sup>23,54,55,60,108-110,127</sup> 2) selection criteria—age greater than 40 yr,<sup>16,101</sup> history of CAD<sup>18</sup> or MI,<sup>15,17-20,51,52,99,100,128</sup> or required vascular surgery;<sup>21,54,55,105-111,129</sup> 3) predictor variable type—routine historical/clinical,<sup>15-20,51,52,99,100</sup> specialized test-derived,<sup>21,55,102-111</sup> or physiologic;<sup>26,27,32,41,112</sup> 4) predictor variable period of measurement—preoperative,<sup>15-22,51,52,55,99,100,102-111,130</sup> intraoperative,<sup>26,27,32,41,112</sup> or postoperative;<sup>33,47</sup> 5) outcome variable type, measurement period, and criteria; and 6) data analysis differences, such as use of univariate<sup>17-20,51,52,99,100</sup> versus multivariate analysis.<sup>16,50,131</sup> The differences among these studies are critical to their interpretation,<sup>132,133</sup> and have been previously reviewed in editorials that have accompanied most of them. The purpose of the present review is to summarize only their results. A detailed review of their design and methodology limitations is beyond the current scope, and the reader is referred to the accompanying editorials.

### HISTORICAL PREDICTORS

**Age.** By the year 2055, the population of the United States will grow by an estimated 49% (to 331 million),<sup>†</sup> with the elderly population (>65 yr) increasing approximately three times as fast (162%) to constitute 20% of the total population (66 million). Forty percent of all surgical procedures will be performed in patients over age 65, potentially compromised by MI, because the incidence of CAD increases with age. Although age does not appear to affect resting ejection fraction, left ventricular volume, and regional wall motion,<sup>134,135</sup> it does depress cardiac response to different forms of stress, such as exercise or exogenous catecholamines.<sup>134,136,137</sup> Consequently, aged patients incur greater surgical complications requiring more intensive and costly hospital care.<sup>138-141</sup> For example, perioperative MI is now the leading cause of postoperative death in the elderly undergoing noncardiac surgery.<sup>126</sup>

Data supporting the predictive value of age<sup>16,18,19,50,100,101</sup> are equal to those refuting it<sup>17,20,22,53,126</sup> (table 3). Results from a study by Carliner *et al.*<sup>101</sup> indicate a

38% incidence of ischemia, MI, or cardiac death in patients older than 70 versus 7% in those aged 40-49, whereas Driscoll *et al.*<sup>19</sup> report that age is a significant predictor only when other factors are present. Age may not be as important as the patient's overall physiologic status.<sup>142,143</sup>

**Previous Myocardial Infarction.** Patients with prior MI are at greater risk for perioperative reinfarction (5-8%)<sup>17,22,51,52,64</sup> than those without prior MI (0.1-0.7%),<sup>17,48,49</sup> and have a reinfarction mortality rate of 36-70%. The more recent the previous MI, the more likely is reinfarction. Within 3 months, the reinfarction rate exceeds 30%; at 3-6 months, it is 15%; and after 6 months, approximately 6%.<sup>17,22,51,52,144</sup>

Several studies have challenged these data (table 3). Foster *et al.*<sup>50</sup> studied 1,600 patients (Coronary Artery Surgery Study registry) undergoing noncardiac surgery with CAD (458 patients), without CAD (399), or after a previous CABG (743). Multivariate analysis did not demonstrate that a history of MI, including one within 6 months of noncardiac surgery, had a statistically significant independent association with operative mortality or cardiac morbidity. Wells and Kaplan<sup>127</sup> detected no myocardial reinfarction in 48 patients undergoing surgery within 3 months of an infarction. Rao *et al.*<sup>15</sup> found that reinfarction occurred in only 1.9% of 733 patients who had a previous MI. Perioperative reinfarction occurred in only 5.7% of patients whose MI was less than 3 months old, and in 2.3% with an MI 4-6 months' old. Eighty-nine percent (651/733) of their patients undergoing elective noncardiac surgery had arterial catheters, 83% (607/733) had pulmonary artery catheters, and 60% (439/733) had extended ICU care (3-4 days postoperatively). From Rao's findings, some have inferred that preoperative optimization of the patient's status, aggressive invasive monitoring and therapy, and prolonged ICU stay may significantly reduce reinfarction rates and decrease PCM. However, whether use of these modalities helped to lower reinfarction rates cannot be determined from their study.<sup>145</sup> Moreover, the cost of implementing such care for surgical patients with or at risk for CAD is considerable. Thus, the clinical and financial implications of Rao's findings are substantial, and require independent confirmation before being applied.

**Angina.** Angina usually is associated with angiographically significant (>70% stenosis) CAD. That is, 90% of males older than 40 and females older than 60 who have angina have significant coronary stenosis.<sup>146</sup> Atypical angina is less often (30-65%) associated with angiographic CAD.<sup>146</sup>

A history of stable angina significantly increases the risk of MI and sudden death in ambulatory patients with CAD, but is a controversial predictor in noncardiac surgical patients (table 3). A number of studies support angina

† Anderson JM: National Institute on Aging Macroeconomic-Demographic Model, U. S. Department of Health and Human Services, Publications 84-2492, Bethesda, MD, National Institute on Aging, 1984.

TABLE 3. Preoperative Risk Factors: Historical

| Factor                                             | Author, Reference, Year                                                                                                                                                                                                                                                                                                                     |                                                                                                                                                                                                                             |
|----------------------------------------------------|---------------------------------------------------------------------------------------------------------------------------------------------------------------------------------------------------------------------------------------------------------------------------------------------------------------------------------------------|-----------------------------------------------------------------------------------------------------------------------------------------------------------------------------------------------------------------------------|
|                                                    | Supported                                                                                                                                                                                                                                                                                                                                   | Refuted                                                                                                                                                                                                                     |
| Age                                                | Driscoll <sup>19</sup> 1961, Dack <sup>100</sup> 1963, Arkins <sup>18</sup> 1964, Goldman <sup>16</sup> 1977, Carliner <sup>101</sup> 1985, Foster <sup>50</sup> 1986                                                                                                                                                                       | Mauney <sup>20</sup> 1970, Tarhan <sup>17</sup> 1972, Steen <sup>22</sup> 1978, Djokovic <sup>126</sup> 1979, von Knorring <sup>55</sup> 1981, Wells <sup>127</sup> 1981, Rao <sup>15</sup> 1983, Foster <sup>50</sup> 1986 |
| Previous myocardial infarction (recent, <6 months) | Knapp <sup>51</sup> 1962, Topkins <sup>52</sup> 1964, Arkins <sup>18</sup> 1964, Frazer <sup>349</sup> 1967, Tarhan <sup>17</sup> 1972, Steen <sup>22</sup> 1978, Eerola <sup>128</sup> 1980, Hertzner <sup>56</sup> 1983, von Knorring <sup>55</sup> 1981, Schoeppe <sup>65</sup> 1983, Larsen <sup>147</sup> 1987                         |                                                                                                                                                                                                                             |
| Previous myocardial infarction (old, undetermined) | Topkins <sup>52</sup> 1964, von Knorring <sup>21</sup> 1981, Sapala <sup>99</sup> 1975, Schoeppe <sup>65</sup> 1983, Cooperman <sup>153</sup> 1978, Larsen <sup>147</sup> 1987, Jamieson <sup>64</sup> 1982                                                                                                                                 | Mauney <sup>20</sup> 1970, Goldman <sup>16</sup> 1977, Carliner <sup>101</sup> 1985, Foster <sup>50</sup> 1986                                                                                                              |
| Angina                                             | Driscoll <sup>19</sup> 1961, Tarhan <sup>17</sup> 1972, Sapala <sup>99</sup> 1975, Larsen <sup>147</sup> 1987, Jamieson <sup>64</sup> 1982, von Knorring <sup>55</sup> 1981                                                                                                                                                                 | Goldman <sup>16</sup> 1977, Cooperman <sup>153</sup> 1978, Steen <sup>22</sup> 1978, Wells <sup>127</sup> 1981, Foster <sup>50</sup> 1986, Carliner <sup>101</sup> 1985, Rao <sup>15</sup> 1983                             |
| Congestive heart failure                           | Goldman <sup>16</sup> 1977, Cooperman <sup>153</sup> 1978, Rao <sup>15</sup> 1983, Larsen <sup>147</sup> 1987, Foster <sup>50</sup> 1986                                                                                                                                                                                                    | —                                                                                                                                                                                                                           |
| Hypertension                                       | Driscoll <sup>19</sup> 1961, Mauney <sup>20</sup> 1970, Prys-Roberts <sup>162</sup> 1971, Tarhan <sup>17</sup> 1972, Steen <sup>22</sup> 1978, von Knorring <sup>55</sup> 1981, Schneider <sup>163</sup> 1983                                                                                                                               | Cooperman <sup>153</sup> 1978, Goldman <sup>173</sup> 1979, Riles <sup>129</sup> 1979, Rao <sup>15</sup> 1983, Foster <sup>50</sup> 1986                                                                                    |
| Diabetes mellitus                                  | Driscoll <sup>19</sup> 1961, Tarhan <sup>17</sup> 1972, Hertzner <sup>56</sup> 1983, Foster <sup>50</sup> 1986, Larsen <sup>147</sup> 1987                                                                                                                                                                                                  | Mauney <sup>20</sup> 1970, Goldman <sup>16</sup> 1977, Steen <sup>22</sup> 1978                                                                                                                                             |
| Dysrhythmia                                        | Sapala <sup>99</sup> 1975, Goldman <sup>16,223</sup> 1977, 1978, Cooperman <sup>153</sup> 1978, Foster <sup>50</sup> 1986                                                                                                                                                                                                                   | —                                                                                                                                                                                                                           |
| Peripheral vascular disease                        | Driscoll <sup>19</sup> 1961, Jeffrey <sup>54</sup> 1983, Schoeppe <sup>65</sup> 1983, Boucher <sup>55</sup> 1985                                                                                                                                                                                                                            | Goldman <sup>16</sup> 1977                                                                                                                                                                                                  |
| Valvular heart disease                             | Skinner <sup>190</sup> 1964, Goldman <sup>16</sup> 1977                                                                                                                                                                                                                                                                                     | —                                                                                                                                                                                                                           |
| Cholesterol                                        | —                                                                                                                                                                                                                                                                                                                                           | —                                                                                                                                                                                                                           |
| Cigarette smoking                                  | —                                                                                                                                                                                                                                                                                                                                           | Foster <sup>50</sup> 1986                                                                                                                                                                                                   |
| Previous CABG surgery                              | Scher <sup>205</sup> 1976, McCollum <sup>204</sup> 1977, Mahar <sup>20</sup> 1978, Crawford <sup>205</sup> 1978, Read <sup>202</sup> 1978, Kimbris <sup>206</sup> 1981, Wells <sup>127</sup> 1981, Diehl <sup>201</sup> 1983, Schoeppe <sup>65</sup> 1983, Hertzner <sup>11</sup> 1984, Reul <sup>199</sup> 1986, Foster <sup>50</sup> 1986 | —                                                                                                                                                                                                                           |
| Previous PTCA                                      | —                                                                                                                                                                                                                                                                                                                                           | —                                                                                                                                                                                                                           |
| Cardiovascular therapy                             | Miller <sup>171</sup> 1975, Bruce <sup>168</sup> 1979, Foëx <sup>169</sup> 1983, Engelman <sup>172</sup> 1984, Cucchiara <sup>122</sup> 1986, Magnusson <sup>121</sup> 1986, Stone <sup>34</sup> 1988                                                                                                                                       | —                                                                                                                                                                                                                           |
| Risk indices                                       | Vacanti <sup>288</sup> 1970 ASA, Goldman <sup>16</sup> 1977 CRI, Djokovic <sup>126</sup> 1979 ASA, Cooperman <sup>153</sup> 1978, Zeldin <sup>348</sup> 1984 CRI, Detsky <sup>151</sup> 1986 modified CRI                                                                                                                                   | Lewin <sup>217</sup> 1971 ASA, Jeffrey <sup>54</sup> 1983 CRI, Carliner <sup>101</sup> 1985 CRI, Gerson <sup>102</sup> 1985 CRI, Foster <sup>50</sup> 1986 CCS                                                              |

ASA = American Society of Anesthesiologists classification.  
CRI = Cardiac risk index.

CCS = Canadian Cardiovascular Society.

as a predictor.<sup>17,19,53,64,99,147</sup> However, Goldman *et al.*<sup>16</sup> found that stable angina was a “conspicuously insignificant” predictor using either univariate or multivariate analysis, and Foster *et al.*<sup>50</sup> found that only the use of preoperative nitrates was predictive and angina *per se* was not, using multivariate analysis. One explanation for the low perioperative risk associated with stable angina (in a number of studies<sup>15,16,22,50,101,127,153</sup>) may be that 75% or more of ischemic episodes in patients with CAD, are painless or silent,<sup>7,8</sup> placing these patients at risk because of ischemia *per se*, the presence of symptoms of angina conferring no additional risk.<sup>9,10</sup> The importance of other angina-related factors, such as severity, character (*e.g.*, Prinzmetal’s) and instability, have not been studied.

**Congestive Heart Failure.** Approximately 2.3 million people in the United States have CHF,<sup>1</sup> and in hospitalized patients aged 65 or older, CHF is the leading diagnosis-

related group.\*\* Clinical or radiologic evidence of left ventricular failure is associated with a poor prognosis in patients with CAD, and is one of the most important predictors of short- and long-term cardiac mortality in the patient with acute MI. The 5-yr survival rate of patients with heart failure is less than 50%.\*\* In patients with an ejection fraction less than 0.30 (determined by radionuclear imaging), 1-yr cumulative mortality is as high as 30%.<sup>148-151</sup> Two-year mortality is approximately 78% in those who have an elevated filling pressure (>15 mmHg) and a depressed stroke work index (<20 g-m/m<sup>2</sup>), compared with 10% in patients with compensated left ven-

\*\* Diagnosis-related group data are from the National Hospital Discharge Survey: United States, 1985, Hyattsville, MD: National Center for Health Statistics, 1987; DHHS publication no. (PHS) 87-(Advance data no. 137, July 2, 1987).

tricular function (PCWP <15 mmHg and normal stroke work index).<sup>152</sup>

Preoperative CHF is a predictor of PCM,<sup>15,16,50,147,153</sup> but the predictive value of specific signs is controversial. Goldman *et al.*<sup>16</sup> suggested that two signs of heart failure have predictive value, a third heart sound and jugular venous distention, but that others, like cardiomegaly, do not. Foster *et al.*<sup>50</sup> found that a number of signs and symptoms, such as a third heart sound or orthopnea, were univariate predictors of outcome, but that only the left ventricular wall-motion score was predictive using multivariate analysis. The usefulness of other more quantified measures, such as ejection fraction (one of the best measures of global ventricular function),<sup>152</sup> has been studied,<sup>90,106,107,147</sup> and findings suggest that a depressed preoperative ejection fraction (<0.40, as determined by radionuclear imaging or ventriculography) is predictive of perioperative MI, reinfarction, and perioperative ventricular dysfunction.

**Hypertension.** The most common cardiovascular disease in the United States is hypertension, affecting more than 59 million people.<sup>1</sup> Hypertension is a risk factor for ischemic heart disease, CHF, and stroke.<sup>154,155</sup> Both the severity of systolic and diastolic hypertension, and the co-presence of other major predictors are important. The risk of fatal and nonfatal MI in patients with diastolic hypertension (>90 mmHg) is increased markedly in the presence of hypercholesterolemia, cigarette smoking, and ECG abnormalities.<sup>156</sup> Treatment of hypertension reduces mortality associated with stroke and heart failure, but apparently not MI.<sup>155,157-161</sup>

Whether preoperative hypertension is predictive of PCM remains controversial (table 3). Some investigators have shown that patients with untreated, poorly treated, or labile preoperative hypertension are at greater risk for perioperative blood pressure lability, dysrhythmias, myocardial ischemia, and transient neurologic complications.<sup>17,19,20,22,53,162-167</sup> Withdrawal of preoperative hypertensive medications, such as  $\beta$  blockers, calcium-channel blockers, or clonidine, is associated with greater perioperative blood pressure lability.<sup>168-172</sup> Prys-Roberts *et al.*<sup>162</sup> suggested that preoperative hypertension predicted perioperative MI, and others supported hypertension as a predictor of PCM.<sup>17,19,20,22,53,163</sup> However, Foster *et al.*<sup>50</sup> found it to be only a univariate predictor, and Goldman *et al.*,<sup>173</sup> Rao *et al.*,<sup>15</sup> and others<sup>129,153</sup> demonstrated that mild-to-moderate preoperative hypertension did not predict irreversible cardiovascular outcomes. Rather, preoperative hypertension may predict several probable "intermediates" of outcome, such as intraoperative blood pressure lability and myocardial ischemia. The issue remains unresolved.

**Diabetes Mellitus.** Diabetes mellitus is a risk factor for CAD, imposing as much as a two- to threefold increase

in the risk for atherosclerotic disease.<sup>174</sup> In diabetics, MI is the leading cause of death<sup>124</sup> and appears to be associated with more complications and a lower overall survival rate than in nondiabetics.<sup>125,175</sup> MI and myocardial ischemia in diabetics tend to be silent, more so than in other subgroups of patients. Asymptomatic diabetics with CAD commonly display transient ST depression on ambulatory monitoring, and perfusion defects during thallium stress testing.<sup>176,177</sup> The etiology of the silent ischemic pattern may be related to altered sensory afferents.<sup>178</sup> Diabetics with abnormal autonomic tone (20-40% of diabetics) appear to be at particular risk of myocardial ischemia, infarction, and cardiomyopathy.<sup>176,178-180</sup> Even in the absence of myocardial ischemia, cardiovascular morbidity is increased due to diabetic cardiomyopathy.<sup>179</sup>

Initial studies reported a strong association between diabetes and PCM, then others found that diabetes was significantly predictive only when other factors, such as CHF, were present.<sup>16,20,22,53</sup> Recent studies using more sensitive techniques have reaffirmed diabetes as a potential predictor.<sup>17,19,50,56,147</sup> Altered autonomic *versus* normal tone in diabetics may indicate greater intraoperative risk for blood pressure lability.<sup>181</sup> The presence of diabetes in vascular surgery patients may identify a population in whom dipyridamole thallium imaging may be useful.<sup>110</sup> The relative risks of type I (insulin-dependent) *versus* type II diabetes and treated *versus* untreated diabetes, and the benefits of therapy and of controlling perioperative glucose levels need to be analyzed.

**Dysrhythmias.** Dysrhythmias are not uncommon and are usually benign in healthy patients without known heart disease. In the presence of CAD or left ventricular dysfunction, they become ominous.<sup>182</sup> Frequent premature ventricular contractions with evidence of ventricular dysfunction increase risk in patients with chronic ischemic heart disease.<sup>183,184</sup> In patients with acute MI, ventricular dysrhythmias or conduction disturbances detected in the late-hospital period indicate a poor outcome.<sup>185,186</sup> The association of ventricular dysrhythmias and hypokalemia in patients with acute ischemia increases their risk of developing ventricular fibrillation.<sup>187</sup>

Few studies have adequately assessed the importance of preoperative dysrhythmias. The available data suggest that frequent premature ventricular contractions or rhythms other than normal-sinus on the preoperative ECG are independent predictors in patients undergoing non-cardiac surgery.<sup>16,50,99,153,223</sup> On the other hand, the presence of bifascicular or trifascicular (complete or incomplete) block, right bundle-branch block, or left anterior hemiblock does not appear to increase perioperative risk, unless these conditions are associated with a more serious condition, such as MI.<sup>188,189</sup>

**Peripheral Vascular Disease.** Ischemic heart disease is common in patients with disease of the carotid artery, the

aorta, or the peripheral circulation.<sup>57-59</sup> For example, significant coronary artery stenosis ( $>70\%$ ) is present in 14–78% of these patients, regardless of their CAD symptoms.<sup>11,60</sup> Long-term prognosis in patients with peripheral vascular disease is related to the stability of the ischemic heart disease and the degree of ventricular dysfunction.<sup>106,107</sup>

Patients with peripheral vascular disease undergoing vascular surgery have a high risk of PCM. MI occurs in as many as 15% of these patients and accounts for more than 50% of their perioperative mortality.<sup>11,56</sup> CAD also is prevalent: Hertzer *et al.*<sup>11</sup> found that only 8% of these patients have normal preoperative angiograms.<sup>11</sup> Thus, their high perioperative and long-term morbidity and mortality may be related to the presence of CAD or the stresses of peripheral vascular surgery.<sup>19,54,55,65</sup> In contrast, Goldman *et al.*<sup>16</sup> report no increased risk of perioperative MI or cardiac death due to peripheral vascular procedures, but a high risk of postoperative pulmonary edema with aortic surgery. For nonvascular surgery, the perioperative risk associated with the presence of peripheral vascular disease is unknown.

**Valvular Heart Disease.** The prognosis for patients with valvular heart disease depends on disease type and severity, and the timeliness of surgical repair. The perioperative risk associated with preoperative valvular heart disease in noncardiac surgical patients is difficult to assess because of other confounding factors commonly associated with valvular disease, including ventricular dysfunction, dysrhythmias, pulmonary hypertension, and CAD. Limited data indicate that aortic stenosis is associated with increased perioperative mortality,<sup>16,190</sup> but other abnormalities may not be. For example, Goldman *et al.*<sup>16</sup> found that aortic stenosis was a significant predictor associated with a fourteen-fold increase in mortality. Although they also found an increased risk of postoperative CHF with mitral stenosis and insufficiency, only aortic stenosis was associated with increased mortality in the absence of other predictors (*e.g.*, an  $S_3$  gallop or jugular venous distention). Because so few studies have been performed, the predictive value of either aortic or mitral valvular disease is uncertain.

**Cholesterol.** The anatomic configuration and physiologic changes associated with atherosclerotic plaque are remarkably similar in patients who have the familial or non-familial form of hypercholesterolemia.<sup>191</sup> Both forms are predictive of cardiovascular mortality: the Framingham Study<sup>192</sup> and the Multiple Risk Factor Intervention Trial<sup>193</sup> demonstrated a direct relationship between serum cholesterol and cardiovascular mortality. Therapeutic trials conducted by the Helsinki Heart Study<sup>194</sup> and the Lipid Research Center<sup>195,196</sup> have shown that treating elevated serum cholesterol may reduce this mortality. The

perioperative risk associated with hypercholesterolemia is unknown.

**Cigarette Smoking.** The Framingham Study<sup>97</sup> demonstrated an increased risk of MI in smokers, with a disproportionate number of patients suffering both infarction and death from CAD. Smoking has acute and chronic effects on myocardial oxygen supply and demand. The acute effects on oxygen supply include increased coronary vascular resistance (especially in the presence of stenosis) and increased carboxyhemoglobin levels. The increase in rate pressure product results in increased oxygen demand.<sup>197</sup> The chronic effects of smoking include vasoconstriction, enhanced platelet aggregation, and loss of endothelial integrity, leading to accelerated atherosclerosis.<sup>198</sup> However, Foster *et al.*<sup>50</sup> found that cigarette smoking was neither a univariate nor multivariate predictor of adverse cardiac outcome following noncardiac surgery. Other data are not available.

**Previous Coronary Artery Bypass Graft (CABG) Surgery.** Previous CABG surgery appears to confer protection against the development of PCM. At least 12 studies involving more than 2,000 patients report a significantly lower postoperative infarction rate and cardiac mortality in prior CABG patients undergoing noncardiac surgery.<sup>11,50,65,127,199-206</sup> Data pooled from these studies show the postoperative incidence of MI in these patients to be 0–1.2% versus 1.1–6% in patients without prior CABG surgery, and mortality to be 0.5–0.9% versus 1–2.4%. For example, Foster *et al.*<sup>50</sup> studied 1,600 registry patients (Coronary Artery Surgery Study) and found a 0.9% (7/743) mortality in those with previous CABG undergoing noncardiac surgery, and 2.4% (11/458) in patients without prior CABG ( $P = 0.009$ ). Mortality in patients with previous CABG was not statistically different from that in patients without CAD undergoing noncardiac surgery: 0.5% (2/399). In contrast, studies of simultaneous CABG and noncardiac surgery report higher mortalities (4–13%), attributed to the unstable nature of either the coronary or vascular disease.<sup>11,199</sup>

**Previous Percutaneous Transluminal Coronary Angioplasty.** Introduced approximately 8 yr ago, coronary angioplasty is now performed in more than 300,000 patients annually in the United States, and now exceeds the number of CABG surgeries performed annually.<sup>1</sup> In addition, newer adaptations of this technique, such as coronary atherectomy using mechanical and laser technologies, are being introduced. The complication rates associated with angioplasty have decreased and the short- and long-term outcomes have improved.<sup>207-210</sup> There are no data on the effects of angioplasty in patients undergoing subsequent noncardiac surgical procedures.

**Cardiovascular Therapy.** The beneficial effects of nitrates,  $\beta$  blockers, and calcium-channel blockers in patients

with CAD are well known. Preoperative withdrawal of these therapies is associated with a higher incidence of perioperative ischemia, dysrhythmias, MI, and cardiac death.<sup>168-172</sup> The possible prophylactic benefit of these pharmacologic therapies is being investigated. Several studies suggest that preoperative oral  $\beta$ -blocker therapy or preinduction iv  $\beta$ -blocker administration decreases the incidence of intraoperative ischemia in both cardiac and noncardiac surgical patients.<sup>34,120-122</sup> Additionally,  $\beta$ -blocker therapy may be more effective prophylactically than preoperative calcium-channel blocker therapy.<sup>123,211</sup> Preoperative administration of clonidine has been shown to decrease anesthetic requirement,<sup>212,213</sup> catecholamines,<sup>212</sup> and intra- and postoperative blood pressure lability in CABG patients<sup>212</sup> and in hypertensive patients undergoing noncardiac surgery.<sup>213</sup> However, neither of these recent studies was blinded, and both involved only a limited number of patients (20 and 30, respectively).<sup>214</sup> Thus, although a number of cardiovascular medications may be potentially useful, larger-scale outcome studies, particularly in patients undergoing noncardiac surgery, are necessary to identify the subgroups of patients who will benefit from prophylactic therapy.

**Risk Indices.** Several multivariate risk indices have been proposed for quantifying preoperative predictors. These include the American Society of Anesthesiologists' (ASA) classification,<sup>215</sup> the cardiac risk index,<sup>16</sup> the New York Heart Association (NYHA) classification,<sup>216</sup> and the Canadian Cardiovascular Society (CCS) classification.<sup>216</sup> The most widely used are the ASA and cardiac risk index classifications. By multivariate analysis of 1,001 patients undergoing noncardiac surgery, Goldman *et al.*<sup>16</sup> identified, weighed, and summed nine significant predictors to form the cardiac risk index. Based on this index, four patient cohorts were classified according to progressively increased risk of morbid outcome. Goldman *et al.*'s study

was the first to attempt to develop a multivariate risk index using prospective analysis of a large group of patients. The general applicability of the cardiac risk index and other indices has been challenged,<sup>50,54,101,102,217</sup> with each supported or refuted by an equal number of studies (table 3). No consistently accurate and generally applicable risk index has been developed.

#### DIAGNOSTIC TESTING PREDICTORS

The controversial status of most historical predictors presents a preoperative assessment dilemma. How can we evaluate perioperative risk in the patient who is older, has previous MI, stable angina, and hypertension? In the 1980s, several investigators concluded that the historical predictors were relatively insensitive, and that only non-routine preoperative cardiac testing could evaluate risk accurately. The diagnostic tests suggested for preoperative assessment of noncardiac surgical patients include exercise stress testing, echocardiography, radionuclear imaging, and, most recently, dipyridamole thallium imaging. Studies exploring their effectiveness as predictors are still few, and the results, at times, controversial (table 4). Cost potentially limits their use. Individual tests range from \$250–\$1,500; if applied routinely, even in a subgroup of the noncardiac surgical population at risk, the annual increase in national health-care costs would be in the tens-to-hundreds of millions of dollars. For example, preoperative use of dipyridamole thallium imaging in one-half of the population requiring vascular procedures would increase the annual costs in excess of \$100 million. The following sections review the routine and nonroutine testing modalities.

**Twelve-Lead Electrocardiography (ECG).** Preoperative ECG abnormalities appear to be common, occurring in

TABLE 4. Preoperative Risk Factors: Diagnostic Tests

| Factor                                  | Author, Reference, Year                                                                                                                                                                                               |                              |
|-----------------------------------------|-----------------------------------------------------------------------------------------------------------------------------------------------------------------------------------------------------------------------|------------------------------|
|                                         | Supported                                                                                                                                                                                                             | Refuted                      |
| 12-lead ECG                             | Driscoll <sup>19</sup> 1961, Baers <sup>219</sup> 1965, Hunter <sup>220</sup> 1968, Cooperman <sup>155</sup> 1978, Mauney <sup>20</sup> 1970, von Knorring <sup>53</sup> 1981, Carliner <sup>101,221</sup> 1985, 1986 | Goldman <sup>225</sup> 1978  |
| Chest x-ray abnormalities               | Goldman <sup>16</sup> 1977, Foster <sup>50</sup> 1986                                                                                                                                                                 | —                            |
| Exercise-stress testing                 | Gage <sup>103</sup> 1977, Cutler <sup>104,105</sup> 1979, 1981, Gerson <sup>102</sup> 1985, von Knorring <sup>21</sup> 1986                                                                                           | Carliner <sup>101</sup> 1985 |
| Ambulatory monitoring                   | Raby <sup>349</sup> 1989                                                                                                                                                                                              | —                            |
| Precordial echocardiography             | —                                                                                                                                                                                                                     | —                            |
| Transesophageal echo                    | —                                                                                                                                                                                                                     | —                            |
| Radionuclear imaging                    | Pasternack <sup>106,107</sup> 1984, 1985, Gerson <sup>102</sup> 1985                                                                                                                                                  | —                            |
| Dipyridamole-thallium imaging           | Boucher <sup>55</sup> 1985, Brewster <sup>111</sup> 1985, Cutler <sup>108</sup> 1987, Leppo <sup>109</sup> 1987, Eagle <sup>110</sup> 1987, Eagle <sup>251</sup> 1989                                                 | London <sup>252</sup> 1988   |
| Magnetic resonance imaging/spectroscopy | —                                                                                                                                                                                                                     | —                            |
| Cardiac catheterization                 | Hertzner <sup>11,12</sup> 1984, 1985                                                                                                                                                                                  | —                            |

40–70% of CAD patients undergoing noncardiac surgery. The most frequent abnormality is ST-T wave changes (65–90%), followed by signs of left ventricular hypertrophy (10–20%), and Q-waves (0.5–8%).<sup>16,19,20,53,101,153,218–222</sup> In Rabkin and Horne's study<sup>218</sup> of 812 patients, 40% of preoperative ECG abnormalities were new, occurring within 24 months before surgery, and were related to age and the presence of known cardiac disease.

Despite the widespread use of preoperative ECG to obtain a baseline profile of patients with suspected or known heart disease, only a few prospective studies have explored its predictive value. Carliner *et al.*<sup>101</sup> studied 200 patients older than 40 undergoing elective noncardiac surgery and found that an abnormal preoperative ECG was the only statistically significant independent predictor of adverse cardiac outcome, even more predictive than preoperative exercise stress test changes. Specifically, ST-T wave ischemic or nonspecific changes and intraventricular conduction delays were the abnormalities which occurred most frequently in the patients with outcomes.<sup>221</sup> In contrast, Goldman *et al.*<sup>223</sup> found that ECG abnormalities, including old Q-waves, ST-T wave changes, or bundle branch blocks, had no significant predictive value. Further study is therefore necessary.

**Chest Radiography (x-ray).** In patients with CAD, chest x-ray abnormalities are predictive of ventricular function abnormalities detectable by ventriculography. For example, the presence of cardiomegaly indicates a low ejection fraction ( $<0.40$ ) in over 70% of patients with CAD.<sup>224</sup> Since a low preoperative ejection fraction predicts PCM,<sup>90,106,107,147</sup> preoperative radiographic cardiomegaly also might predict PCM. Foster *et al.*<sup>50</sup> have reported cardiomegaly to be a univariate predictor. However, Goldman *et al.*<sup>16</sup> dispute this finding, but support the presence of a tortuous or calcified aorta on the preoperative chest x-ray as a predictor.

**Exercise Stress Testing.** Exercise stress testing is a relatively inexpensive, noninvasive test commonly used to diagnose chest pain of unknown origin and to determine prognosis for patients with known CAD. It is highly predictive of subsequent cardiac events when ST changes are: 1) characteristic; 2) large ( $>2.5$  mm); 3) immediate (first 1–3 min); 4) sustained into the recovery period; or 5) associated with subnormal increases in blood pressure.<sup>225–227</sup> Exercise stress testing has limited value for generalized screening in healthy asymptomatic patients.

Controversy surrounds the preoperative use of exercise stress testing to predict patients most likely to develop adverse cardiac outcome. Several studies have demonstrated that a positive ischemic response and a low exercise capacity predict outcome following noncardiac surgery.<sup>21,102–105</sup> Cutler *et al.*<sup>105</sup> found that perioperative MI occurred in 37% of vascular surgery patients with a positive ischemic response *versus* 1.5% without. Preoperative

exercise stress testing also proved a more sensitive indicator than the clinical history or preoperative ECG results. Twenty-seven percent of patients with a negative history and normal preoperative ECG had a positive exercise stress test; 26% of these developed perioperative MI. Cutler *et al.* argued that such asymptomatic patients would escape identification by risk-factor analysis and recommended routine use of preoperative exercise stress testing. In contrast, Carliner *et al.*<sup>101</sup> found that preoperative exercise stress testing did not independently predict cardiac risk in noncardiac surgical patients over age 40: the routine preoperative ECG was the only statistically significant independent predictor in their population. Thus, the effectiveness of preoperative exercise stress testing in identifying at-risk patients remains controversial.

**Ambulatory ECG Monitoring.** Ambulatory ECG monitoring has proven successful in detecting ST-segment changes in patients with CAD. Frequent episodes of ST depression, indicative of subendocardial ischemia, occur during normal daily activities.<sup>7,8,228–232</sup> Typically, these episodes are asymptomatic (silent) and probably unrelated to heart rate.<sup>7,233,234</sup> That they represent myocardial ischemia remains to be determined, but preliminary results suggest that they are associated with myocardial perfusion abnormalities.<sup>233</sup> These silent episodes may be as indicative of the development of subsequent MI as angina-related episodes.<sup>9,10</sup>

Preoperative Holter monitoring has been evaluated for preoperative screening of noncardiac surgical patients. Preliminary results indicate that 18–40% of surgical patients with or at risk for CAD have frequent ischemic episodes during the 48 h preceding surgery,<sup>26,33,130</sup> that most ( $>75\%$ ) of these episodes appear to be clinically silent,<sup>33</sup> and that preoperative ischemia may predict outcome.<sup>349</sup>

**Precordial Echocardiography.** Precordial echocardiography is a noninvasive, relatively inexpensive imaging technique that is used to assess ventricular and valvular function, regional wall motion and thickening and pericardial tamponade, and to diagnose MI, left ventricular aneurysms, septal rupture, papillary muscle abnormalities and thrombus formation. This technique is prognostic of both short- and long-term outcomes in patients with acute MI,<sup>235</sup> but its preoperative prognostic value is unknown. However, radionuclear and angiographic studies have shown that preoperative ventricular dysfunction or segmental wall-motion abnormalities detected using either technique predict perioperative ventricular dysfunction.<sup>90,106,107,147</sup> Since echocardiography provides similar information less invasively and expensively, it is potentially more useful.

**Transesophageal Echocardiography (TEE).** Awake TEE is now used for characterizing left atrial thrombi, valvular vegetations and prosthetic valvular function, and for as-

sessing dissecting aortic aneurysm.<sup>236-240</sup> Its predictive value in noncardiac surgical patients has not been studied.

**Radionuclear Imaging.** Radionuclear imaging is used to detect MI, quantify myocardial perfusion abnormalities, and calculate ventricular performance and wall-motion indices. Technetium pyrophosphate (hot-spot imaging) and thallium 201 (cold-spot imaging) are used for MI imaging. Technetium pyrophosphate imaging is sensitive†† (>90%) and moderately specific (>50%) for detection of acute MI, and most useful 2-3 days after a suspected MI.<sup>241,242</sup> Thallium imaging also is highly sensitive<sup>243</sup> (particularly during the first 24 h after a suspected MI), but not as specific as pyrophosphate imaging:<sup>242</sup> the perfusion defect imaged may be infarction (fixed defect) or ischemia (transient defect). Stress thallium imaging, performed under conditions of near-maximal coronary blood flow (exercise, dipyridamole), is more sensitive than rest imaging and capable of detecting perfusion heterogeneities with stenoses as low as 50%.<sup>14,244</sup> Both MI (fixed defect) and myocardial ischemia (redistribution abnormality) are detectable using any of these stress imaging techniques. Exercise thallium scintigraphy reportedly has 90% sensitivity in patients with multiple-vessel disease and 60% in those with single-vessel disease.<sup>245,246</sup> Specificities are generally greater than 90%, with few false positives. Dipyridamole thallium imaging is both sensitive (93%) and specific (80%) for detection of coronary stenoses in patients selected for coronary angiography.<sup>247</sup> It is also sensitive (92%), but not specific (44%),<sup>248</sup> for detection of long-term (1-2 yr) outcome following acute MI. Positron-emission tomography and single-photon emission computed tomography are other imaging techniques being explored.<sup>249,250</sup>

The predictive value of preoperative radionuclear imaging has been studied primarily in vascular surgery patients. During lower extremity revascularization or abdominal aortic aneurysm resection, the gated-pool-determined ejection fraction has been shown to be an independent predictor of PCM. Pasternack *et al.*<sup>106,107</sup> found that an ejection fraction of less than 0.35 was associated with a 75-85% incidence of perioperative MI and an ejection fraction greater than 0.35, with a 19-20% incidence. Exercise radionuclear ventriculography has been studied in older patients scheduled for elective abdominal or thoracic surgery.<sup>102</sup> The inability to exercise for 2 min (with heart rate > 99 beats/min) was found to be the best predictor of PCM. Neither resting ejection fraction nor historical predictors were as significant.

Preoperative dipyridamole thallium imaging recently

has been studied in patients undergoing vascular surgery.<sup>55,108-111,251</sup> Though unblinded and uncontrolled, these studies demonstrated that preoperative dipyridamole thallium imaging is highly sensitive (89-100%), reasonably specific (53-80%), and superior to historical predictors or exercise stress testing. The negative predictive value (identifying the absence of abnormality) is nearly 100%. The positive predictive value (identifying the presence of abnormality) is low (17-50%), because of the large number of false positives, but increases when reperfusion criteria include two or more dysfunctional segments, or when high-risk subsets of patients are chosen for preoperative imaging.<sup>108,110</sup> For example, Eagle *et al.*<sup>110</sup> found that patients with a history of angina, prior MI, CHF, or diabetes mellitus had an outcome event rate of 37% versus 0% in patients without these predictors. Thus, dipyridamole thallium imaging may permit additional risk stratification in selected subgroups of patients.<sup>251</sup> Additionally, thallium redistribution abnormalities may predict patients most likely to develop TEE-detectable regional wall-motion abnormalities during major noncardiac surgery, although not adverse outcome.<sup>252</sup>

**Magnetic Resonance Imaging/Spectroscopy.** Magnetic resonance imaging of the heart is a relatively noninvasive technique that provides high resolution tomographic and three-dimensional images. Recent studies in animals and humans indicate that magnetic resonance imaging can reliably detect acute MI, wall thinning and aneurysm formation,<sup>253-255</sup> and subtle atrial and ventricular defects.<sup>256</sup> Magnetic resonance spectroscopy can now quantify intracellular pH and the levels of high-energy compounds within living cells. Recent spectroscopy studies focus on the pathophysiologic mechanisms associated with myocardial ischemia.<sup>244</sup> Because magnetic resonance imaging and spectroscopy have not been studied in patients undergoing surgery, their perioperative value in surgical patients with CAD is unknown.

**Cardiac Catheterization.** Cardiac catheterization has been the "gold standard" for quantifying ventricular function and assessing coronary circulation. Studies in patients undergoing CABG surgery have shown that ventricular function indices, such as ejection fraction, wall-motion abnormalities, end-diastolic volume and change in end-diastolic pressure, are predictive of perioperative ventricular dysfunction and short- and long-term outcome.<sup>90,257-259</sup> Angiographic findings demonstrating significant left-main or multivessel disease also are predictive of short- and long-term outcome.<sup>260-263</sup>

Preoperative coronary angiography in patients undergoing vascular and general surgery has been studied, particularly by Cleveland Clinic investigators.<sup>11,12</sup> These studies indicate that a relatively high incidence of coronary stenosis exists in these patients, regardless of symptoms or other predictors. They also demonstrate that patients

†† Sensitivity = TP/(TP + FN); specificity = TN/(TN + FP); positive predictive value = TP/(TP + FP); and negative predictive value = TN/(TN + FN), where TP = true positive; TN = true negative; FP = false positive; and FN = false negative.<sup>155</sup>

who had CABG surgery before vascular surgery had lower rates for early (1.5% *vs.* 12%) and late mortality (12% *vs.* 26%), and a higher cumulative 5-yr survival rate (72% *vs.* 43%) than patients without prior CABG. Thus, the information obtained from angiography and ventriculography is useful for diagnosing patients who require CABG surgery before noncardiac surgery. It also may be useful for predicting PCM. For example, a low ejection fraction (<0.40) determined by radionuclear imaging predicts PCM in patients undergoing vascular surgery, suggesting that the ejection fraction derived from preoperative ventriculography may be similarly predictive. However, the expense and morbidity associated with cardiac catheterization, and the existence of alternative less costly and less risky techniques limit its application, even in high-risk patients.

### PREOPERATIVE PREDICTORS—CONCLUSIONS

Recent (<6 months) MI and current CHF are the only two consistently proven preoperative predictors of PCM. The value of other historical predictors, such as previous (old) MI, angina, previous CHF, hypertension, diabetes, and age, is still unresolved. Although selected populations may benefit from the use of specialized nonroutine testing, the efficacy and cost effectiveness of these tests remain controversial.

### The Intraoperative Predictors

That the preoperative disease state affects outcome is clear. However, intraoperative factors also appear to affect outcome substantially, independent of the disease state. Over the past two decades, researchers have studied the "classical" intraoperative predictors, such as choice of anesthetic, immediacy of surgery, site of surgery, and duration of anesthesia and surgery. Recently recognized is that dynamic events occurring intraoperatively may cause PCM, including hypertension, hypotension, tachycardia, myocardial ischemia (ECG, TEE), ventricular dysfunction and dysrhythmias. The importance of these dynamic predictors is unknown: What are the acceptable ranges of blood pressure in the patient with CAD? Should CAD patients undergoing major surgery be monitored using TEE because it is more sensitive than ECG? Is there a "best anesthetic" for the patient with CAD? Current data on the classical and dynamic intraoperative predictors are summarized in the following sections (and table 5).

### CLASSICAL PREDICTORS

*Choice of Anesthetic.* Does the choice of anesthetic affect surgical outcome? This question has been studied for the last 35 yr and every known anesthetic and technique investigated. Three controversies persist for patients with

cardiac disease: 1) use of regional *versus* general anesthesia; 2) use of inhalational *versus* narcotic anesthesia; and 3) use of isoflurane in patients with CAD (potential coronary artery steal).

A number of studies in patients with cardiac disease have compared the effects of regional *versus* general anesthesia on the incidence of perioperative infarction, dysrhythmias, and CHF. Studies by Rao *et al.*,<sup>15</sup> Steen *et al.*,<sup>22</sup> Backer *et al.*,<sup>264</sup> and Prough *et al.*<sup>265</sup> have suggested no difference in infarction rate during general and regional (spinal, epidural, upper extremity, local) anesthesia. For example, Rao *et al.*<sup>15</sup> reported a 1.8% (12/659) reinfarction rate in patients undergoing general anesthesia *versus* 2.7% (2/74) for regional anesthesia. Backer *et al.*<sup>264</sup> documented the safety of local anesthesia and/or retrobulbar block in 195 patients with prior infarction undergoing 288 ophthalmic procedures. No reinfarctions occurred in this group; however, no reinfarctions occurred in the group undergoing general anesthesia (21 patients, 26 procedures) either. Regional anesthesia may, however, benefit patients with prior MI undergoing transurethral prostatectomy: the reinfarction rate for spinal anesthesia has been reported to be less than 1%, *versus* 2–8% for general anesthesia.<sup>266,267</sup> (Other studies have suggested that regional is superior to general anesthesia, but study limitations restrict their applicability.<sup>99,268</sup>) Studies of the incidence of dysrhythmias using continuous ECG<sup>93</sup> and intermittent techniques<sup>223,267</sup> suggest no significant difference between regional and general anesthesia. Kurer *et al.*<sup>93</sup> found no difference between anesthetic techniques (dysrhythmia incidence with general anesthesia = 66% *vs.* 52% with regional); but that surgical site was predictive, with the incidence of dysrhythmias ranging from 53–100%, depending on the site. Although only limited data are available for CHF, they suggest that such patients benefit from the use of regional anesthesia. Goldman *et al.*<sup>223</sup> found that spinal anesthesia was not associated with new or worsening heart failure, compared with 4% of patients in new failure and 22% with worsening of pre-existing failure during general anesthesia. In addition, Yeager *et al.*<sup>269</sup> recently reported that only 1/28 (3.6%) patients receiving epidural anesthesia (and "light levels of general anesthesia") and postoperative epidural analgesia developed CHF *versus* 10/25 (40%) patients given general anesthesia and postoperative parenteral narcotic analgesia. Thus, regional anesthesia may offer an advantage over general anesthesia for certain types of surgery (prostate resection) or for specific patients (history of CHF). Otherwise, no one technique demonstrates a consistent advantage.

The use of inhalational *versus* narcotic anesthesia in patients with cardiac disease is still debated,<sup>114,270–272</sup> although the cardiovascular effects of both techniques and the physiologic differences between them are well docu-



TABLE 5. Intraoperative Risk Factors

| Factor                         | Author, Reference, Year                                                                                                                                                                                                                                                                                                                                                                                                  |                                                                                                                                                                                                                                                                                         |
|--------------------------------|--------------------------------------------------------------------------------------------------------------------------------------------------------------------------------------------------------------------------------------------------------------------------------------------------------------------------------------------------------------------------------------------------------------------------|-----------------------------------------------------------------------------------------------------------------------------------------------------------------------------------------------------------------------------------------------------------------------------------------|
|                                | Supported                                                                                                                                                                                                                                                                                                                                                                                                                | Refuted                                                                                                                                                                                                                                                                                 |
| Classical risk factors         |                                                                                                                                                                                                                                                                                                                                                                                                                          |                                                                                                                                                                                                                                                                                         |
| Anesthetic                     | Rao <sup>15</sup> 1983                                                                                                                                                                                                                                                                                                                                                                                                   | Driscoll <sup>19</sup> 1961, Knapp <sup>51</sup> 1962, Topkins <sup>52</sup> 1964, Arkins <sup>18</sup> 1964, Mauney <sup>20</sup> 1970, Tarhan <sup>17</sup> 1972, Goldman <sup>16</sup> 1977, Steen <sup>22</sup> 1978, Djokovic <sup>126</sup> 1979, von Knorring <sup>53</sup> 1981 |
| Site of surgery                | Tarhan <sup>17</sup> 1972, Goldman <sup>16</sup> 1977, Steen <sup>22</sup> 1978, Rao <sup>15</sup> 1983, Larsen <sup>147</sup> 1987                                                                                                                                                                                                                                                                                      | Driscoll <sup>19</sup> 1961, Topkins <sup>52</sup> 1964, Cooperman <sup>153</sup> 1978, von Knorring <sup>53</sup> 1981, Foster <sup>50</sup> 1986                                                                                                                                      |
| Duration of anesthesia/surgery | Arkins <sup>18</sup> 1964, Cogbill <sup>287</sup> 1967, Mauney <sup>20</sup> 1970, Goldman <sup>16</sup> 1977, Steen <sup>22</sup> 1978                                                                                                                                                                                                                                                                                  | Driscoll <sup>19</sup> 1961, Topkins <sup>52</sup> 1964, Tarhan <sup>17</sup> 1972, Djokovic <sup>126</sup> 1979, von Knorring <sup>53</sup> 1981, Rao <sup>15</sup> 1983                                                                                                               |
| Emergency surgery              | Arkins <sup>18</sup> 1964, Vacanti <sup>288</sup> 1970, Goldman <sup>16</sup> 1977, Djokovic <sup>126</sup> 1979, Larsen <sup>147</sup> 1987                                                                                                                                                                                                                                                                             | Rao <sup>15</sup> 1983                                                                                                                                                                                                                                                                  |
| Dynamic risk factors           |                                                                                                                                                                                                                                                                                                                                                                                                                          |                                                                                                                                                                                                                                                                                         |
| Hypertension                   | Plumlee <sup>49</sup> 1972, Steen <sup>22</sup> 1978                                                                                                                                                                                                                                                                                                                                                                     | Goldman <sup>16</sup> 1977, Riles <sup>129</sup> 1979, Schoeppel <sup>65</sup> 1983, Rao <sup>15</sup> 1983                                                                                                                                                                             |
| Hypotension                    | Wroblewski <sup>98</sup> 1952, Wasserman <sup>25</sup> 1955, Driscoll <sup>19</sup> 1961, Chamberlain <sup>24</sup> 1964, Mauney <sup>20</sup> 1970, Plumlee <sup>49</sup> 1972, Goldman <sup>16,173</sup> 1977, 1979, Steen <sup>22</sup> 1978, Mahar <sup>200</sup> 1978, Riles <sup>129</sup> 1979, Eerola <sup>128</sup> 1980, von Knorring <sup>53</sup> 1981, Schoeppel <sup>65</sup> 1983, Rao <sup>15</sup> 1983 | Nachlas <sup>308</sup> 1961                                                                                                                                                                                                                                                             |
| Tachycardia                    | Rao <sup>15</sup> 1983                                                                                                                                                                                                                                                                                                                                                                                                   | —                                                                                                                                                                                                                                                                                       |
| Myocardial ischemia            | Smith <sup>32</sup> 1985                                                                                                                                                                                                                                                                                                                                                                                                 | —                                                                                                                                                                                                                                                                                       |
| Ventricular dysfunction        | Rao <sup>15</sup> 1983                                                                                                                                                                                                                                                                                                                                                                                                   | —                                                                                                                                                                                                                                                                                       |
| Dysrhythmias                   | Sapala <sup>99</sup> 1975, Steen <sup>22</sup> 1978                                                                                                                                                                                                                                                                                                                                                                      | Goldman <sup>223</sup> 1978, Rao <sup>15</sup> 1983                                                                                                                                                                                                                                     |

mented. Their differences imply that one anesthetic may perform better than another in selected risk groups. However, most outcome studies have not demonstrated a difference between anesthetics in the patient with cardiac disease (table 5). Ten of 11 outcome studies of more than 3,000 noncardiac surgical patients with CAD have concluded that anesthetic type does not affect outcome.<sup>16-20,22,51-53,126</sup> Only one study, (Rao *et al.*<sup>15</sup>) has suggested a difference: narcotic-nitrous oxide-relaxant anesthesia was found to be associated with a significantly ( $P < 0.005$ ) higher incidence of myocardial reinfarction—7.0% versus 0.5–1.5% for other general anesthetics, and 2.7% for regional anesthesia. However, five of these 11 studies were retrospective,<sup>17,18,22,51,126</sup> resulting in incomplete and nonstandardized data collection. Of the six prospective studies,<sup>15,16,19,20,52,53</sup> only two thoroughly measured cardiac outcomes<sup>15,53</sup> and none used a random anesthetic assignment.<sup>145</sup> More rigorous methods may (or may not) demonstrate differences between the inhalational and iv narcotic techniques. Rao *et al.*'s unique findings have been challenged by two large-scale outcome studies of patients undergoing CABG surgery,<sup>273,274</sup> which report that anesthetic choice does not affect outcome. However, these studies also have limitations, precluding absolute resolution of the issue.<sup>114</sup>

The potential for inducing coronary artery steal in cardiac patients has provoked arguments for restricting the use of isoflurane. A moderate coronary vasodilator, isoflurane may cause coronary steal in patients with coronary

artery stenosis and a "steal-prone" anatomy.<sup>29,119,275</sup> Since it is the most commonly used anesthetic and CAD is the most commonly encountered disease, their potential relationship is important to define. Studies in animals and humans spanning the last 5 yr have demonstrated that isoflurane produces moderate coronary vasodilation of the epicardial resistance vessels, less vasodilation than adenosine, but more than halothane or enflurane.<sup>29,115-119,275-279</sup> In a canine model of chronic coronary occlusion, Buffington *et al.*<sup>118</sup> found that isoflurane, as the primary anesthetic, can cause coronary steal. However, Cason *et al.*<sup>278</sup> found that isoflurane as an adjuvant (even at 1.5 MAC) to high-dose narcotic anesthesia in dogs produced neither significant vasodilation nor coronary steal. In vascular surgery and CABG patients, Reiz *et al.*<sup>29</sup> and Moffitt *et al.*<sup>276</sup> found that isoflurane reduced coronary perfusion pressure without reducing coronary blood flow, and was associated with ischemia in 48% (10/21) and 27% (3/11) of patients, respectively. Although the mechanism for ischemia in these patients could have been coronary artery steal, definitive data are lacking. In contrast, several studies in patients undergoing cardiac and noncardiac surgery suggest that isoflurane produces no more intraoperative ischemia than other anesthetics.<sup>273,280-283</sup> In humans, therefore, the issues of isoflurane-induced ischemia and isoflurane-induced coronary steal remain unresolved.

**Site of Surgery.** Patients undergoing thoracic or upper abdominal surgery have a two- to threefold higher risk

of perioperative cardiac complications<sup>15-17,22,147</sup> (table 5). However, von Knorring *et al.*<sup>53</sup> found that the site, as well as the duration, of surgery did not affect outcome in 214 patients with CAD undergoing general orthopedic or trauma surgery. Factors such as intraoperative hypotension were more important. Thus, the presence of confounding variables complicates analysis.<sup>19,50,52,53,153</sup>

Patients with CAD undergoing major vascular surgery are unquestionably at increased risk for perioperative MI, CHF, and cardiac death. Infarction rates as high as 15-40% have been reported during aortic-abdominal aneurysm repair and aorto-femoral bypass grafting.<sup>11,56,57,61-64,284-286</sup> The intraoperative stresses associated with vascular surgery, combined with underlying CAD, appear to be responsible for the high complication rate.<sup>11,57-60</sup>

**Duration of Anesthesia and Surgery.** Procedures lasting more than 3 h are associated with greater PCM<sup>16,18,20,22,287</sup> (table 5). Usually, they are also major surgical procedures associated with greater hemodynamic changes and other stresses. Whether the duration of anesthesia and surgery *per se* has an independent effect on outcome is, therefore, unclear.<sup>15,17,19,52,53,126</sup>

**Emergency Surgery.** Most studies support that emergency surgery increases the risk of PCM by two- to five-fold<sup>16,18,126,147,288</sup> (table 5). Only one study,<sup>15</sup> suggests no increased risk associated with emergency procedures.

#### CLASSICAL PREDICTORS—CONCLUSIONS

Among the classic intraoperative predictors, emergency surgery, vascular surgery, and prolonged (>3 h) thoracic or upper abdominal surgery appear to be independent predictors of perioperative morbidity, while choice of anesthetic does not.

#### DYNAMIC PREDICTORS

Acute imbalances in myocardial oxygen supply and demand may produce ischemia that may, in turn, result in irreversible cardiac morbidity. Dynamic intraoperative changes may, therefore, predict PCM. The following are the preliminary findings (table 5).

**Hypertension.** Acute hypertension affects both myocardial oxygen demand and supply. During systemic hypertension, peak systolic ventricular pressure increases and produces commensurate increases in wall tension, which increases myocardial oxygen consumption. Effects on myocardial oxygen supply depend on the status of ventricular function. In the nonfailing ventricle, hypertension may elevate diastolic pressure above increases in left ventricular end-diastolic pressure, thereby raising coronary-perfusion pressure.<sup>289-293</sup> Buffington *et al.*<sup>293</sup> demonstrated in dogs that elevation of mean blood pressure to 120 mmHg in the presence of severe stenosis was well

tolerated in the nonfailing heart. At any given heart rate, regional ventricular function was better when blood pressure was elevated. However, in the failing ventricle, the increases in the end-diastolic pressure may exceed the increases in the arterial diastolic pressure and decrease coronary perfusion pressure.<sup>294,295</sup> Intramyocardial wall tension also may increase precipitously and elevate coronary vascular resistance.<sup>296</sup> In addition, sympathetic coronary constriction during the hypertensive episode may decrease coronary flow.<sup>297-299</sup> Studies in humans undergoing cardiac and noncardiac surgery have failed to demonstrate a conclusive causal relationship between acute intraoperative hypertension and myocardial ischemia.<sup>15,26,28,30,33-35,112,300-303</sup> Most studies suggest that fewer than 15% of ischemic episodes are associated with hypertension,<sup>15,26,33-35,112,301-303</sup> but some have shown that acute hypertensive episodes precede as many as 50% of intraoperative ischemic episodes.<sup>28,30,300</sup> Thus, the effects of hypertension on the ischemic state of the ventricle depend on several factors for which physiologic studies in animals and humans have yet to establish causal relationships.

The predictive importance of intraoperative hypertension for PCM is unresolved (table 5). The studies of Plumlee *et al.*<sup>49</sup> and Steen *et al.*<sup>22</sup> suggest a relationship between hypertension and outcome, while others do not.<sup>15,16,65,129</sup> Steen *et al.* found that the perioperative reinfarction rate was significantly higher in hypertensive patients (9.2% *vs.* 4.4% nonhypertensive patients), while Rao *et al.*<sup>15</sup> reported that reinfarction occurred in three of eight patients who developed hypertension with tachycardia, but in none of those who developed only hypertension.

**Hypotension.** Although hypotension reduces myocardial wall tension, decreasing oxygen demand, its effects on coronary blood flow appear to predominate. As diastolic blood pressure falls below the autoregulatory limit, coronary blood flow decreases. In animal models with coronary stenosis, this decrease in oxygen supply is associated with new or worsened ischemic dysfunction.<sup>304-306</sup>

At least 13 studies have investigated the relationship between intraoperative hypotension and myocardial ischemia in cardiac and noncardiac patients.<sup>26-28,30,33-35,112,162,301-303,307</sup> Five of these have found a causal relationship.<sup>26,35,162,303,307</sup> For example, Lieberman *et al.*<sup>35</sup> showed that ischemia could occur with as little as 6% decrease in mean arterial pressure. Kotter *et al.*<sup>303</sup> found that 25% of ischemic events (6/24) were associated with a 20% or greater decrease in systolic blood pressure. The animal studies of Buffington *et al.*<sup>293</sup> and Hickey *et al.*<sup>304</sup> support these findings, suggesting that in the presence of severe stenosis, decreases in arterial pressure cause or worsen ischemic dysfunction evaluated by lactate determinations, systolic thickening changes, or ECG changes. Thus, a causal relationship between hypotension and

ischemia may exist; however, neither the degree nor the duration of hypotension necessary to precipitate ischemia has been determined.

Intraoperative hypotension does, however, appear to be an important predictor of PCM. The results of outcome studies conducted over the last 35 yr (table 5) are consistent with the physiologic findings.<sup>15,16,19,20,22-24,49,53,65,98,128,129,173,200</sup> Steen *et al.*<sup>22</sup> reported a significantly higher reinfarction rate (15.2% *vs.* 3.2%,  $P < 0.001$ ) among patients who developed intraoperative systolic hypotension ( $\geq 30\%$ ,  $\geq 10$  min). Rao *et al.*<sup>15</sup> found that intraoperative hypotension was the strongest dynamic predictor of perioperative MI: nine of 12 patients who developed intraoperative hypotension reinfarcted perioperatively. Among the studies cited (table 5), only the retrospective study of Nachlas *et al.*<sup>308</sup> refuted hypotension as a predictor, finding no significant difference in mortality between patients who had intraoperative hypotension (systolic blood pressure decrease  $> 40$  mmHg) and those who did not (11.5% *vs.* 8.1%, respectively,  $P =$  not significant).

**Tachycardia.** Increases in heart rate deleteriously affect myocardial oxygen supply (decreased diastolic filling time) and oxygen demand (increased minute work). In animals with coronary stenosis, increasing heart rate precipitates or worsens ischemia,<sup>309,310</sup> while decreasing heart rate improves it.<sup>311</sup> Studies in anesthetized patients undergoing cardiac and noncardiac surgery have demonstrated a causal relationship between intraoperative tachycardia and intraoperative ischemia.<sup>26-28,30,33-35,112,301-303,307</sup> Some suggest that the combination of tachycardia and hypotension is particularly ominous.<sup>35,293</sup>

Intraoperative tachycardia as a predictor of PCM has not been thoroughly investigated. Although Slogoff and Keats<sup>112</sup> have suggested a causal relationship between tachycardia and outcome in patients undergoing CABG surgery, only one study in noncardiac surgical patients (Rao *et al.*<sup>15</sup>) suggests such a relationship. Perioperative MI occurred in two of 16 patients with tachycardia and in three of eight hypertensive patients with tachycardia. Although not statistically significant, these data suggest a relationship between tachycardia and PCM.

**Myocardial ischemia.** A number of technologies have been used to identify and characterize intraoperative ischemia, including: ECG, TEE, pulmonary artery monitoring, radionuclear imaging, cardiokymography, and biochemical assays. We will focus on those studies addressing these technologies in patients undergoing noncardiac surgery.

**ECG ST abnormalities:** Sensitive techniques for the measurement of intraoperative myocardial ischemia have been recently introduced, including multiple-lead ECG and TEE, which permit identification of characteristics of in-

traoperative ischemia in noncardiac surgical patients. Intraoperative ECG changes consistent with myocardial ischemia are present in 18-74% of noncardiac surgical patients with CAD.<sup>27-31,33-35,38</sup> Most changes are ST depression; ST elevation appears to be uncommon.<sup>27,33</sup> London *et al.*<sup>27</sup> have demonstrated that most ST changes occur laterally, with 90% in leads V<sub>4</sub> and V<sub>5</sub>, and vary in duration (1-258 min). Although there are several non-ischemic etiologies for ST changes, such as ventricular hypertrophy or altered electrical activity, these are usually chronic conditions and not reversible. Consequently, reversible ST changes are likely to be ischemic. T-wave changes also occur,<sup>47,312</sup> but these are more nonspecific than ST changes. The data describing the relationship of ECG changes to indices of supply and demand are not consistent. However, "nondemand" ischemia may constitute up to 50% or more of the intraoperative episodes.<sup>27,30,33</sup> Although such ischemia may be due to atherosclerotic plaque rupture with accelerated thrombosis and vessel spasm,<sup>43-46</sup> the etiology remains unknown.

Do intraoperative ECG ST abnormalities predict PCM? It is unclear whether patients who develop ECG ST changes indicative of myocardial ischemia during noncardiac surgery are at greater risk for intra- and postoperative MI. Studies by Slogoff and Keats<sup>112,313</sup> in patients undergoing CABG support this hypothesis: prebypass ischemia increased the risk of MI by two- to threefold. In their first study, 37% (377/1023) of their patients developed ST changes prior to bypass and had an infarction rate of 6.9%, in contrast to the 2.5% rate in the 63% (646/1023) who did not develop prebypass ischemia. (Ischemia time and surgical rating of the anastomoses were also predictors using multivariate analysis.) Pursuing this question further, Knight *et al.*<sup>26,130</sup> demonstrated that a chronic, often "silent" pattern of ischemia existed preoperatively in CABG patients. Such a pattern may exist in noncardiac surgery patients.<sup>33</sup> Furthermore, the intraoperative pattern of ischemia was no worse than the preoperative pattern, implying that anesthesia and surgery may not be as stressful as previously assumed, and that the intraoperative pattern may simply recapitulate the chronic preoperative pattern. However, definitive outcome studies, contrasting the relative predictive value of preoperative, intraoperative, and even postoperative ischemia are unavailable, especially in noncardiac surgery patients.

**TEE wall-motion/thickening abnormalities:** Segmental wall-motion and wall-thickening abnormalities are more sensitive and earlier indices of myocardial ischemia than ECG changes in both animals and humans.<sup>314-316</sup> In 1935, Tennant and Wiggers<sup>314</sup> demonstrated that with coronary artery ligation, regional contractile failure occurred almost immediately. The earliest changes appear to be bio-

chemical: oxygen deprivation causing insufficient ATP production (anaerobic glycolysis), a decrease in ATP turnover, cellular acidosis, and entrapment of calcium. Mechanical dysfunction results, manifested by the inability of the myocardial wall to thicken, followed by wall-motion abnormalities, progressing from hypokinesis to akinesis to dyskinesis.<sup>315,316</sup> Endocardial ECG ST changes occur, and are followed by surface ECG changes. In previously compromised hearts, or in those that develop global ischemia, diastolic compliance then decreases, filling pressure increases, and systolic dysfunction occurs. Although a number of sensitive techniques are available for detection of ischemia, such as magnetic resonance spectroscopy, radio-labeled lactate determinations, or direct measurement of end-diastolic pressure, they are impractical. The most sensitive, practical detector of intraoperative ischemia appears to be TEE. In patients undergoing coronary angioplasty, wall-motion abnormalities are more sensitive and earlier indices of myocardial ischemia than surface ECG changes.<sup>316</sup> In humans undergoing either cardiac or noncardiac surgery, TEE wall-motion and thickening abnormalities, consistent with ischemia, are more common than ECG changes,<sup>32,41,42</sup> even when continuous 12-lead ECG is used.<sup>42</sup> Most ECG changes are accompanied by TEE changes, but the converse has not been reported. Other characteristics of TEE ischemia, such as the frequency, duration, magnitude, and relationship to supply and demand, have not been studied.

Do intraoperative TEE abnormalities predict PCM? Preliminary data indicate that TEE wall-motion and wall-thickening changes indicative of myocardial ischemia, even when unaccompanied by ECG changes, are predictive of PCM.<sup>32,41,317</sup> Smith *et al.*<sup>32</sup> found that four of 50 major vascular or CABG patients who developed a perioperative MI had intraoperative wall-motion abnormalities, and only one of four had ECG abnormalities. Three of four had persistent intraoperative wall-motion abnormalities occurring in the same area as the infarct, and the fourth had a transient wall-motion abnormality. Leung *et al.*<sup>41</sup> found that the presence of immediate postbypass wall-motion abnormalities was the best predictor of PCM in patients undergoing CABG surgery. Fifty patients undergoing elective CABG surgery were studied using continuous TEE and ECG intraoperatively and intermittently in the ICU. The incidence of wall-motion abnormalities exceeded the incidence of ST changes throughout all periods. Neither prebypass TEE abnormalities nor ECG abnormalities occurring at any time predicted adverse outcome. Only postbypass TEE abnormalities predicted outcome: 6/18 patients with postbypass wall-motion abnormalities had adverse outcome *versus* 0/32 without abnormalities. In noncardiac surgical patients, London *et al.*<sup>42</sup> reported a 33% incidence of intraoperative TEE wall-motion abnormalities in 95 patients with or at risk for

CAD. Eight of the nine patients who developed adverse cardiac outcomes had preceding intraoperative wall-motion abnormalities. Though suggestive, these data are only preliminary; the predictive value of TEE in noncardiac surgery patients remains unknown.

*Pulmonary artery monitoring of ischemia:* Pulmonary artery monitoring provides information useful in assessing ventricular systolic and diastolic function and pulmonary transudation of fluids. Measurement of PCWP has been suggested as an early and sensitive indicator of myocardial ischemia, to be used when the ECG is nondiagnostic.<sup>113</sup> Data from animal and human studies demonstrate that during acute coronary occlusion, exercise precipitates ECG ST changes, and early and marked increases in left ventricular end-diastolic pressure.<sup>318-323</sup> Thus, end-diastolic pressure appears to be an early and sensitive marker of ischemia. Whether PCWP is as sensitive a measure as end-diastolic pressure in either animals or humans is unknown. Studies in patients with acute MI challenge the possibility. Rahimtoola *et al.*<sup>324</sup> have shown that left ventricular end-diastolic pressure increases during ischemia, due to the effects of end-atrial systolic emptying on the stiffened and ischemic left ventricle, but that these increases are not reflected in the mean left ventricular diastolic pressure, the left-atrial pressure, or the PCWP. The PCWP was up to 15 mmHg lower than the left ventricular end-diastolic pressure and did not increase significantly during ischemia. Although acute increases in PCWP (or development of V-waves) may reflect ischemia,<sup>113,281</sup> the absence of a change in PCWP does not ensure the absence of ischemia. Häggmark *et al.*<sup>38</sup> reported that in vascular surgery patients the sensitivity, specificity, and predictive value (positive and negative) of PCWP abnormalities ( $\geq 5$  mmHg change from baseline, or the development of an abnormal waveform) for ischemia (ECG or cardiokymography abnormalities, or lactate production) ranged between 40 and 60%. In CABG patients, Lieberman *et al.*<sup>35</sup> also found a low positive predictive value (24%), but a higher negative predictive value (85%); however, the PCWP was no better than central venous pressure measurement, except in patients with moderate to severe preoperative ventricular dysfunction. Leung *et al.*<sup>302</sup> found that 61% of TEE wall-motion abnormalities in CABG patients occurred without significant changes ( $>20\%$  of control) in heart rate, systolic arterial pressure, or pulmonary artery pressure. Only 10% of episodes were accompanied by 5 mmHg or greater changes in pulmonary artery pressure. Roizen *et al.*<sup>36</sup> found that 11/12 patients developed TEE wall-motion abnormalities when the aorta was cross-clamped above the supraceliac artery, but that PCWP remained normal ( $\leq 12$  mmHg) in 10/12 with only 2/12 having transient increases. Therefore, these studies question the value of pulmonary artery catheterization and monitoring for detection of intra-

operative ischemia, except perhaps in patients with preoperative ventricular dysfunction. Further study is warranted.

**Radionuclear imaging of ischemia:** Radionuclear imaging techniques allow assessment of ischemia as well as ventricular function, and have been used in several intraoperative studies of patients with CAD.<sup>91,325,326</sup> However, when used intraoperatively, they are primarily research tools, without widespread clinical application.

**Cardiokymographic detection of ischemia:** Cardiokymography is a noninvasive technique that allows analog representation of anterior wall motion. The probe is a capacitive plate placed over the chest wall emitting a low-energy, high-frequency (10 MHz) electromagnetic field. Motion within the field produces a change in capacitance, and therefore frequency of the oscillation, which is converted to the output voltage signal. Its limitations include the inability to detect wall motion that is not anterior, the presence of interfering noise produced by other artifactual motion, and the inability to maintain probe position during prolonged surgery or thoracic surgery. Previous studies in patients have demonstrated that cardiokymography is more sensitive and specific an indicator of CAD than the ECG.<sup>37-39</sup> Exercise cardiokymography has been shown to have similar sensitivity and specificity as exercise thallium scintigraphy, and significantly better than exercise electrocardiography.<sup>40</sup> In surgical patients, Bellows *et al.*<sup>37</sup> demonstrated a 33% (8/24) incidence of cardiokymographic changes indicative of ischemia in patients with CAD (*vs.* 4% [1/25] in patients without CAD), with 1/8 having ECG ST abnormalities, and 3/8 increased PCWP ( $\geq 4$  mmHg). Häggmark *et al.*<sup>38</sup> compared cardiokymography, single-lead (V<sub>5</sub>) ECG, PCWP, and lactate extraction (left anterior descending artery) in 53 vascular patients with CAD. Seventy-four percent of the patients developed one or more forms of ischemia, with 83% of the episodes detected by cardiokymography, 44% by ECG, 39% by PCWP, and 13% by lactate production. The relationship of cardiokymographic changes to TEE wall-motion abnormalities, or to adverse cardiac outcome, is unknown.

**Biochemical markers of myocardial ischemia (lactate and radiolabeled lactate markers):** Lactate production is one of the most accurate measures of myocardial ischemia. Because of the regional nature of myocardial ischemia and the complex relationship between lactate uptake and production, serum lactate measurement is an insensitive marker of ischemia.<sup>327,328</sup> Radiolabeled lactate determinations permit differentiation between uptake and production and are sensitive markers.<sup>329,330</sup> However, techniques for sampling lactate and radiolabeling lactate are research tools having limited clinical use.

**Ventricular Dysfunction.** Increased ventricular filling pressure, associated with ventricular dysfunction, deleteriously affects both myocardial oxygen supply (coronary

artery back-pressure, coronary vascular resistance) and demand (wall tension). In animals, the failing ventricle may not only precipitate ischemia, but also exacerbate the effects of hypotension, hypertension, and tachycardia on the ischemic state of the ventricle.<sup>294,295</sup> Conversely, ischemia can precipitate ventricular dysfunction and increase end-diastolic pressure, particularly with severe coronary artery stenosis when myocardial oxygen demand is increased (*e.g.*, exercise).<sup>318-320</sup>

Data from one large-scale study suggest a relationship between intraoperative dysfunction and outcome. Rao *et al.*<sup>15</sup> found that PCWP exceeded 25 mmHg in 29/607 patients monitored using pulmonary artery catheters. Twenty-eight percent (8/29) of these patients with elevated PCWP developed perioperative MI *versus* less than 1% of those with no increase in PCWP. Several other studies have suggested that operative mortality was decreased in patients undergoing aortic aneurysm repair monitored with pulmonary artery catheters.<sup>331,332</sup> However, these studies have a number of limitations and further investigation is necessary.

**Dysrhythmias.** Studies using noncontinuous ECG recording techniques report that the incidence of dysrhythmias during noncardiac surgery varies from 0.9–70%.<sup>95,333,334</sup> The range of these incidences likely is due to highly variable monitoring regimens, as well as differences in the inclusion criteria. Continuous ECG recording was used in two studies of dysrhythmias in a total of 254 noncardiac surgical patients.<sup>93,94</sup> The incidence of dysrhythmias was 70%; 28% were ventricular. The first study, (Kuner *et al.*,<sup>93</sup> 1967) was conducted in 154 noncardiac surgical patients who revealed an overall incidence of dysrhythmias of 62%. This incidence was higher during general *versus* regional anesthesia (66% *vs.* 52%), neurologic and thoracic surgery *versus* peripheral surgery (100%, 90% *vs.* 56%), and in intubated *versus* nonintubated patients (72% *vs.* 44%). Twenty-one percent of the dysrhythmias were ventricular (premature ventricular contractions: 18%; ventricular tachycardia: 3%). Surprisingly, pre-existing heart disease did not influence the incidence of dysrhythmias (62% *vs.* 59%). The second study, by Bertrand *et al.*<sup>94</sup> in 1971, found an 84% incidence of dysrhythmias in 100 noncardiac surgical patients. The intraoperative incidence was significantly higher than that during the preinduction phase (84% *vs.* 28%), particularly during intubation and extubation, when 72% of dysrhythmias occurred. Bertrand *et al.* reported a 43% incidence of ventricular dysrhythmias, with the incidence of ventricular dysrhythmias being greater in patients with than without heart disease (60% *vs.* 37%).

Of the four studies attempting to define the predictive value of intraoperative dysrhythmias, two report that they are predictors of PCM<sup>22,99</sup> and two that they are not.<sup>15,223</sup> Rao *et al.*<sup>15</sup> found no correlation between the incidence

or type of dysrhythmias (other than tachycardia) and perioperative reinfarction. Goldman *et al.*<sup>223</sup> found a 4% incidence of new supraventricular tachycardias and a 7% incidence of intraoperative bradycardia, but both types of dysrhythmia were unrelated to PCM. Steen *et al.*'s results<sup>22</sup> generally support dysrhythmia's predictive value, but only indirectly: all eight of their patients who reinfarcted intraoperatively had clinical signs of either hypotension or dysrhythmia. None of these studies has rigorously measured intraoperative dysrhythmias using continuously recorded ECG techniques.

#### DYNAMIC INTRAOPERATIVE PREDICTORS—CONCLUSIONS

Both intraoperative hypotension and tachycardia predict PCM. Hypertension remains a controversial predictor, and ventricular dysfunction and dysrhythmias have not been adequately studied. Myocardial ischemia, as indicated by ECG, TEE, or cardiokymography, is a suggested predictor, but the data apply principally to patients undergoing CABG surgery. Left ventricular end-diastolic pressure is a sensitive measure of ischemia, but preliminary studies suggest that PCWP may be too insensitive. Finally, other measures, such as radionuclear imaging or lactate determination, used primarily in research studies, are impractical for routine clinical use.

#### Postoperative Predictors

The postoperative period can be stressful, due to the onset of pain during emergence from anesthesia, fluid shifts, temperature changes, and alteration of respiratory function. Marked changes occur in plasma catecholamine concentrations,<sup>335–337</sup> hemodynamics,<sup>94,338–342</sup> ventricular function,<sup>343</sup> and coagulation<sup>78–82</sup> following noncardiac surgery, particularly in patients with pre-existing cardiac disease. These stresses place the patient at increased risk for development of adverse cardiac outcome. Because most outcome studies have focused on the pre- and intraoperative periods, there are, as yet, no identified postoperative predictors of adverse outcome.

What is known about postoperative hemodynamic and ischemic changes? Recent studies in both cardiac<sup>26,41</sup> and noncardiac<sup>33,47</sup> surgery have shown that heart rate commonly increases postoperatively by 25–50% over intraoperative values, and that tachycardia (heart rate > 100 beats/min) occurs in 10–25% of patients. Whether postoperative tachycardia is related to ischemia remains unknown. However, these preliminary studies suggest that ischemia does occur most commonly during the postoperative period and persists for 48 h<sup>33</sup> or longer<sup>47</sup> following noncardiac surgery. Also, these postoperative ischemic episodes usually are not manifest by symptoms of typical

or atypical chest pain, symptoms of hypoperfusion, or ventricular failure. Postoperative ischemia thus appears to be silent, and therefore difficult to detect.

A number of factors could account for the silent nature of postoperative ischemia. Patients with ambulatory ischemia have a similar incidence of silent ischemia (>70% of episodes are silent), possibly due to defects in pain threshold and perception.<sup>9,344–346</sup> Moreover, postoperative residual anesthetic or analgesic effects and competing somatic sensory enervation (*e.g.*, incisional pain) may further blunt the perception of, reaction to, or communication of painful ischemic symptoms. Supporting this hypothesis is the finding that most postoperative infarcts are silent (>60%) compared with relatively few nonsurgical infarctions (10–15%).<sup>14,347</sup>

Is postoperative myocardial ischemia a predictor of PCM? The answer is unknown. However, if postoperative ischemia is proven to be an important predictor of morbidity, extended postoperative monitoring and aggressive treatment of ischemia would be indicated, appreciably altering postoperative practice. The cost of such care could be substantial.

#### Conclusions

Perioperative cardiac morbidity is and will continue to be an important health-care problem. Of the 25 million patients who undergo anesthesia and surgery in the United States annually, approximately 2–3 million have, or are at risk for, CAD; an additional 4 million are over the age of 65, and 5 million undergo major surgery. As the elderly population grows at three times the rate of other groups, the prevalence of cardiac disease will increase in our surgical population. The current incidence of PCM in this at-risk population remains unacceptably high, ranging from 2 to 15%.

Over the past 35 yr, approximately 100 outcome studies have examined the problem of PCM in patients undergoing noncardiac surgery. Most have focused on preoperative historical predictors, of which only a recent MI or present CHF are proven predictors of PCM. The efficacy and cost-effectiveness of specialized preoperative cardiac testing, such as exercise stress testing or dipyridamole thallium imaging, remain controversial. Outcome studies of intraoperative predictors have shown that anesthetic choice does not affect outcome, but that emergency surgery, major vascular surgery, and prolonged thoracic or upper abdominal surgery are associated with increased risk. Among the dynamic intraoperative predictors, hypotension and tachycardia appear to predict outcome. Myocardial ischemia, although potentially important, has not been studied rigorously in patients undergoing noncardiac surgery. Studies of the postoperative period are few. Preliminary data suggest that the post-

operative predictors for perioperative cardiac morbidity may be at least as critical as intraoperative factors.

The author wishes to thank the investigators and staff of the Study of Perioperative Ischemia (S.P.I.) research group, and Winifred von Ehrenburg for editorial advice, and Thea Miller.

## References

1. National Center for Health Statistics: Health, United States 1988. DHHS Publication No. (PHS) 89-1232. Public Health Service, Washington, U. S. Government Printing Office, March 1989, pp 10-17, 66, 67, 100, 101
2. Frye RL, Higgins MW, Beller GA, Benson JA, Borer JS, Curry CL, Gersh BJ, Goldman L, Klocke FJ, Savage DD, Williams JF: Task Force III: Major demographic and epidemiologic trends affecting adult cardiology. *J Am Coll Cardiol* 12:840-846, 1988
3. Weinstein MC, Coxson PG, Williams LW, Pass TM, Stason WB, Goldman L: Forecasting coronary heart disease incidence, mortality, and cost: The coronary heart disease policy model. *Am J Public Health* 77:1417-1426, 1987
4. Current Population Reports: U. S. Department of Commerce, Bureau of the Census, Series No. 138, p 23, 1988
5. National Center for Health Statistics: Vital Statistics of the United States 1980. Vol II—Mortality, Part A. DHHS Publication No. (PHS) 85-1101. Hyattsville, MD: NCHS, U. S. Public Health Service, 1985
6. Thom TJ, Kannel WB, Feinleib M: Factors in the decline of coronary heart disease mortality, Coronary Heart Disease. Edited by Conner WE, Bristow JD. Philadelphia, J.B. Lippincott, 1985, pp 5-18
7. Deanfield JE, Maseri A, Selwyn AP, Chierchia S, Ribeiro P, Krikler S: Myocardial ischemia during daily life in patients with stable angina: Its relation to symptoms and heart rate changes. *Lancet* 2:753-758, 1983
8. Cohn PF: Silent myocardial ischemia: Dimensions of the problem in patients with and without angina. *Am J Med* 80 (suppl 4C): 1-8, 1986
9. Epstein SE, Quyyumi AA, Bonow RO: Myocardial ischemia—Silent or symptomatic. *N Engl J Med* 318:1038-1043, 1988
10. Gottlieb SO, Weisfeldt ML, Ouyang P, Mellits ED, Gerstenblith G: Silent ischemia as a marker for early unfavorable outcomes in patients with unstable angina. *N Engl J Med* 314:1214-1219, 1986
11. Hertzner NR, Beven EG, Young JR, Ohara PJ, Ruschhaupt WF III, Graor RA, Dewolfe VG, Maljovec LC: Coronary-artery disease in peripheral vascular patients. A classification of 1,000 coronary angiograms and results of surgical management. *Ann Surg* 199:223-233, 1984
12. Hertzner NR: Clinical experience with preoperative coronary angiography. *J Vasc Surg* 2:510-514, 1985
13. National Center for Health Statistics: Health, United States 1988. DHHS Publication No. (PHS) 89-1232. Public Health Service, Washington, U. S. Government Printing Office, March 1989, pp 111, 122, 175
14. London MJ, Mangano DT: Assessment of perioperative risk, *Advances in Anesthesia*, Volume 5. Edited by Stoelting RK, Barash PG, Gallagher TJ. Year Book Medical Publishers, Chicago, 1988, pp 53-87
15. Rao TK, Jacobs KH, El-Etr AA: Reinfarction following anesthesia in patients with myocardial infarction. *ANESTHESIOLOGY* 59: 499-505, 1983
16. Goldman L, Caldera DL, Nussbaum SR, Southwick FS, Krogstad D, Murray B, Burke DS, O'Malley TA, Goroll AH, Caplan CH, Nolan J, Carabello B, Slater EE: Multifactorial index of cardiac risk in noncardiac surgical procedures. *N Engl J Med* 297:845-850, 1977
17. Tarhan S, Moffitt E, Taylor WF, Giuliani ER: Myocardial infarction after general anesthesia. *JAMA* 220:1451-1454, 1972
18. Arkins R, Smessaert AA, Hicks RG: Mortality and morbidity in surgical patients with coronary-artery disease. *JAMA* 190:485-488, 1964
19. Driscoll AC, Hobika JH, Etsten BE, Proger S: Clinically unrecognized myocardial infarction following surgery. *N Engl J Med* 264:633-639, 1961
20. Mauney MF Jr, Ebert PA, Sabiston DC Jr: Postoperative myocardial infarction: A study of predisposing factors, diagnosis, and mortality in a high risk group of surgical patients. *Ann Surg* 172:497-503, 1970
21. von Knorring J, Lepäntalo M: Prediction of perioperative cardiac complications by electrocardiographic monitoring during treadmill exercise testing before peripheral vascular surgery. *Surgery* 99:610-613, 1986
22. Steen PA, Tinker JH, Tarhan S: Myocardial reinfarction after anesthesia and surgery. *JAMA* 239:2566-2570, 1978
23. Wasserman F, Bellet S, Saichek RP: Postoperative myocardial infarction: Report of twenty-five cases. *N Engl J Med* 252:967-974, 1955
24. Chamberlain DA, Seal-Edmonds J: Effects of surgery under general anesthesia on the electrocardiogram in ischemic heart disease and hypertension. *Br Med J* 2:784-787, 1964
25. Rosen M, Mushin WW, Kilpatrick GS, Campbell H, Davies LGG, Harrison E: Study of myocardial ischemia in surgical patients. *Br Med J* 2:1415-1420, 1966
26. Knight AA, Hollenberg M, London MJ, Tubau J, Verrier E, Browner W, Mangano DT, S.P.I. Research Group: Perioperative myocardial ischemia: Importance of the preoperative ischemic pattern. *ANESTHESIOLOGY* 68:681-688, 1988
27. London MJ, Hollenberg M, Wong MG, Levenson L, Tubau JF, Browner W, Mangano DT, S.P.I. Research Group: Intraoperative myocardial ischemia: Localization by continuous 12-lead electrocardiography. *ANESTHESIOLOGY* 69:232-241, 1988
28. Roy WL, Edelist G, Gilbert B: Myocardial ischemia during noncardiac surgical procedures in patients with coronary artery disease. *ANESTHESIOLOGY* 51:393-397, 1979
29. Reiz S, Bålfors E, Sørensen MB, Ariola S Jr, Friedman A, Truedsson H: Isoflurane—A powerful coronary vasodilator in patients with coronary artery disease. *ANESTHESIOLOGY* 59: 91-97, 1983
30. Coriat P, Harari A, Daloz M, Viars P: Clinical predictors of intraoperative myocardial ischemia in patients with coronary artery disease undergoing noncardiac surgery. *Acta Anæsthesiol Scand* 26:287-290, 1982
31. Coriat P, Daloz M, Bousseau D, Fuscuardi J, Echter E, Viars P: Prevention of intraoperative myocardial ischemia during noncardiac surgery with intravenous nitroglycerin. *ANESTHESIOLOGY* 61:193-196, 1984
32. Smith JS, Cahalan MK, Benefiel DJ, Byrd BF, Lurz FW, Shapiro WA, Roizen MF, Bouchard A, Schiller NB: Intraoperative detection of myocardial ischemia in high-risk patients: Electrocardiography versus two-dimensional transesophageal echocardiography. *Circulation* 72:1015-1021, 1985
33. Fegert G, Hollenberg M, Browner W, Wellington Y, Levenson L, Franks M, Harris D, Mangano D: Perioperative myocardial ischemia in the noncardiac surgical patient (abstract). *ANESTHESIOLOGY* 69:A49, 1988
34. Stone JG, Foëx P, Sear JW, Johnson LL, Khambatta HJ, Triner L: Myocardial ischemia in untreated hypertensive patients: Effect

- of a single small oral dose of a beta-adrenergic blocking agent. *ANESTHESIOLOGY* 68:495-500, 1988
35. Lieberman RW, Orkin FK, Jobs DR, Schwartz AJ: Hemodynamic predictors of myocardial ischemia during halothane anesthesia for coronary artery revascularization. *ANESTHESIOLOGY* 59:36-41, 1983
  36. Roizen MF, Beaupre PN, Alpert RA, Kremer P, Cahalan MK, Schiller N, Sohn YJ, Cronnelly R, Lurz FW, Ehrenfeld WK, Stoney RJ: Monitoring with two-dimensional transesophageal echocardiography: Comparison of myocardial function in patients undergoing supraceliac, suprarenal-infraceliac, or infrarenal aortic occlusion. *J Vasc Surg* 1:300-305, 1984
  37. Bellows WH, Bode RH Jr, Levy JH, Foëx P, Lowenstein E: Non-invasive detection of periinduction ischemic ventricular dysfunction by cardiokymography in humans: Preliminary experience. *ANESTHESIOLOGY* 60:155-158
  38. Häggmark S, Hohner P, Östman M, Friedman A, Diamond G, Lowenstein E, Reiz S: Comparison of hemodynamic, electrocardiographic, mechanical, and metabolic indicators of intraoperative myocardial ischemia in vascular surgical patients with coronary artery disease. *ANESTHESIOLOGY* 70:19-25, 1989
  39. Weiner DA and Principal Investigators: Accuracy of cardiokymography during exercise testing: results of a multicenter study. *J Am Coll Cardiol* 6:502-509, 1985
  40. Silverberg RA, Diamond GA, Vas R, Tzivoni D, Swan HJC, Forrester JS: Noninvasive diagnosis of coronary artery disease: the cardiokymographic stress test. *Circulation* 61:579-589, 1980
  41. Leung J, O'Kelly B, Browner W, Tubau J, Hollenberg M, Mangano DT, S.P.I. Research Group: Prognostic importance of postbypass regional wall-motion abnormalities in patients undergoing coronary artery bypass graft surgery. *ANESTHESIOLOGY* 71:16-25, 1989
  42. London MJ, Tubau JF, Wong MG, Layug E, Mangano DT: The "natural history" of segmental wall motion abnormalities detected by intraoperative transesophageal echocardiography: A clinically blinded prospective approach (abstract). *ANESTHESIOLOGY* 69:A7, 1988
  43. Falk E: Morphologic features of unstable atherothrombotic plaques underlying acute coronary syndromes. *Am J Cardiol* 63:114E-120E, 1989
  44. Conti CR, Mehta JL: Acute myocardial ischemia: Role of atherosclerosis, thrombosis, platelet activation, coronary vasospasm, and altered arachidonic acid metabolism. *Circulation* 75 (suppl V):V-84-V-95, 1987
  45. Willerson JT, Hillis LD, Winniford M, Buja LM: Speculation regarding mechanisms responsible for acute ischemia heart disease syndromes (editorial). *J Am Coll Cardiol* 8:245-250, 1986
  46. Gorlin R, Fuster V, Ambrose JA: Anatomic-physiologic links between acute coronary syndromes (editorial). *Circulation* 74:6-9, 1986
  47. Wong MG, Wellington YC, London MJ, Layug E, Li J, Mangano DT: Prolonged postoperative myocardial ischemia in high-risk patients undergoing noncardiac surgery (abstract). *ANESTHESIOLOGY* 69:A56, 1988
  48. Roberts SL, Tinker JH: Cardiovascular disease, Risk and Outcome in Anesthesia. Edited by Brown DL. Philadelphia, J.B. Lippincott, 1988, pp 33-49
  49. Plumlee JE, Boettner RB: Myocardial infarction during and following anesthesia and operation. *South Med J* 65:886-889, 1972
  50. Foster ED, Davis KB, Carpenter JA, Abele S, Fray D: Risk of noncardiac operation in patients with defined coronary disease: The Coronary Artery Surgery Study (CASS) Registry Experience. *Ann Thorac Surg* 41:42-50, 1986
  51. Knapp RB, Topkins MJ, Artusio JF Jr: The cerebrovascular accident and coronary occlusion in anesthesia. *JAMA* 182:332-334, 1962
  52. Topkins MJ, Artusio JF: Myocardial infarction and surgery: A five-year study. *Anesth Analg* 43:716-720, 1964
  53. von Knorring J: Postoperative myocardial infarction: A prospective study in a risk group of surgical patients. *Surgery* 90:55-60, 1981
  54. Jeffrey CC, Kunsman J, Cullen DJ, Brewster DC: A prospective evaluation of cardiac risk index. *ANESTHESIOLOGY* 58:462-464, 1983
  55. Boucher CA, Brewster DC, Darling RC, Okada RD, Strauss HW, Pohost GM: Determination of cardiac risk by dipyrindamole-thallium imaging before peripheral vascular surgery. *N Engl J Med* 312:389-394, 1985
  56. Hertzner NR: Myocardial ischemia. *Surgery* 93:97-101, 1983
  57. Crawford ES, Bomberger RA, Glaeser DH, Saleh AS, Russell WL: Aortoiliac occlusive disease: Factors influencing survival and function following reconstructive operation over a twenty-five year period. *Surgery* 90:1055-1067, 1981
  58. Brown OW, Hollier LH, Pairolero PC, Kazmier FJ, McCready RA: Abdominal aortic aneurysm and coronary-artery disease. *Arch Surg* 116:1484-1488, 1981
  59. Rokey R, Rolak LA, Harati Y, Kutka N, Verani MS: Coronary artery disease in patients with cerebrovascular disease: A prospective study. *Ann Neurol* 16:50-53, 1984
  60. Tomatis LA, Fierens EE, Verbrugge GP: Evaluation of surgical risk in peripheral vascular disease by coronary arteriography: A series of 100 cases. *Surgery* 71:429-435, 1972
  61. Young AE, Sandberg GW, Couch NP: The reduction of mortality of abdominal aortic aneurysm resection. *Am J Surg* 134:585-590, 1977
  62. Hertzner NR: Fatal myocardial infarction following lower extremity revascularization. Two hundred seventy-three patients followed six to eleven postoperative years. *Ann Surg* 193:492-498, 1981
  63. Hertzner NR: Fatal myocardial infarction following peripheral vascular operations: A study of 951 patients followed 6 to 11 years postoperatively. *Clev Clin Q* 49:1-11, 1981
  64. Jamieson WRE, Janusz MT, Miyagishima RT, Gerein AN: Influence of ischemic heart disease on early and late mortality after surgery for peripheral occlusive vascular disease. *Circulation* 66 (Suppl I):I-92-I-97, 1982
  65. Schoepfel LS, Wilkinson C, Waters J, Meyers NS: Effects of myocardial infarction on perioperative cardiac complications. *Anesth Analg* 62:493-498, 1983
  66. Tomoike H, Egashira K, Yamamoto Y, Nakamura M: Enhanced responsiveness of smooth muscle, impaired endothelium-dependent relaxation and the genesis of coronary spasm. *Am J Cardiol* 63:33E-39E, 1989
  67. Yasue H, Ogawa H, Okumura K: Coronary artery spasm in the genesis of myocardial ischemia. *Am J Cardiol* 63:29E-32E, 1989
  68. Bush LR, Campbell WB, Buja LM, Tilton GD, Willerson JT: Effects of the selective thromboxane synthetase inhibitor dazoxiben on variations in cyclic blood flow in stenosed canine coronary arteries. *Circulation* 69:1161-1170, 1984
  69. Bush LR, Campbell WB, Kern K, Tilton GD, Apprill P, Ashton J, Schmitz J, Buja LM, Willerson JT: The effects of  $\alpha_2$ -adrenergic and serotonergic receptor antagonists on cyclic blood flow alterations in stenosed canine coronary arteries. *Circ Res* 55:642-652, 1984
  70. Willerson Campbell WB, Winniford MD, Schmitz J, Apprill P, Firth BG, Ashton J, Smitherman T, Bush L, Buja LM: Conversion from chronic to acute coronary artery disease: Specu-



- lation regarding mechanisms (editorial). *Am J Cardiol* 54:1349-1354, 1984
71. Hirsh PD, Hillis LD, Campbell WB, Firth BG, Willerson JT: Release of prostaglandins and thromboxane into the coronary circulation in patients with ischemic heart disease. *N Engl J Med* 304:685-691, 1981
72. Werns SW, Shea MJ, Lucchesi BR: Free radicals and myocardial injury: Pharmacologic implications. *Circulation* 74:1-5, 1986
73. Letts G: Leukotrienes: Role in cardiovascular physiology, Thrombosis and Platelets in Myocardial Ischemia. *Cardiovascular Clinics*. Edited by Mehta JL, Conti CR. Philadelphia, F.A. Davis, 1987, pp 101-113
74. Kanaji K, Okuma M, Uchino H: Deficient induction of leukotriene synthesis in human neutrophils by lipoxygenase-deficient platelets. *Blood* 67:903-908, 1986
75. Wargovich T, Mehta J, Nichols WW, Pepine CJ, Conti CR: Reduction in blood flow in normal and narrowed coronary arteries of dogs by leukotriene C<sub>4</sub>. *J Am Coll Cardiol* 6:1047-1051, 1985
76. Fuster V, Steele PM, Chesebro JH: Role of platelets and thrombosis in coronary atherosclerotic disease and sudden death. *J Am Coll Cardiol* 5:175B-184B, 1985
77. Uchida Y, Yoshimoto N, Murao S: Cyclic fluctuations in coronary blood pressure and flow induced by coronary artery constriction. *Jpn Heart J* 16:454-464, 1975
78. Mansfield AO: Alteration in fibrinolysis associated with surgery and venous thrombosis. *Br J Surg* 59:754-757, 1972
79. Britton B, Hawkey C, Wood W, Peele M: Stress—A significant factor in venous thrombosis? *Br J Surg* 61:814-820, 1974
80. Grabfield G: Factors affecting the coagulation time of blood. IX. The effect of adrenaline on the factors of coagulation. *Am J Physiol* 42:46-55, 1916
81. Hoffman BB, Michel T, Breneman TB, Lefkowitz RJ: Interactions of agonists with platelet  $\alpha$ -adrenergic receptors. *Endocrinology* 110:926-932, 1982
82. Zilla P, Fasol R, Groscurth P, Klepetko W, Reichenspurner H, Wolner E: Blood platelets in cardiopulmonary bypass operations. *J Thorac Cardiovasc Surg* 97:379-388, 1989
83. Folts JD, Crowell EB, Rowe LL: Platelet aggregation in partially obstructed vessels and its elimination with aspirin. *Circulation* 54:365-370, 1976
84. Cowley MJ, DiSciascio G, Rehr RB, Vetrovec GW: Angiographic observations and clinical relevance of coronary thrombus in unstable angina pectoris. *Am J Cardiol* 63:108E-113E, 1989
85. Lompre AM, Schwartz K, D'Albis A, Lacombe G, Thiem NV, Swynghedauw B: Myosin isoenzymes redistribution in chronic heart overloading. *Nature* 282:105-107, 1979
86. Alpert NR, Mulieri LA: Increased myothermal economy of isometric force generation in compensated cardiac hypertrophy induced by pulmonary artery constriction in the rabbit. *Cir Res* 50:491-500, 1982
87. Litten RZ, Martin BJ, Low RB, Alpert NR: Altered myosin isoenzyme patterns from pressure-overloaded and thyrotoxic hypertrophied rabbit hearts. *Circ Res* 50:856-864, 1982
88. Kaufmann RL, Homburger H, Wirth H: Disorder in excitation-contraction coupling of cardiac muscle from cats with experimentally produced right ventricular hypertrophy. *Circ Res* 28:346-357, 1971
89. Dhalla NJ: Involvement of membrane systems in heart failure due to intracellular calcium overload and deficiency. *J Molec Cell Cardiol* 8:661-667, 1976
90. Mangano DT: Biventricular function after myocardial revascularization in humans: Deterioration and recovery patterns during the first 24 hours. *ANESTHESIOLOGY* 62:571-577, 1985
91. Mangano DT, Van Dyke DC, Ellis RJ: The effect of increasing preload on ventricular output and ejection in man. Limitations of the Frank-Starling mechanism. *Circulation* 62:535-541, 1980
92. Atlee JL III: Perioperative cardiac dysrhythmias, Cardiac Dysrhythmias and Anesthesia: Mechanisms, Recognition, Management. Edited by Atlee JL III. Chicago, Year Book Medical Publishers, 1985, pp 3-15
93. Kuner J, Enescu V, Utsu F, Boszormenyi E, Bernstein H, Corday E: Cardiac arrhythmias during anesthesia. *Dis Chest* 52:580-587, 1967
94. Bertrand CA, Steiner NV, Jameson AG, Lopez M: Disturbances of cardiac rhythm during anesthesia and surgery. *JAMA* 216:1615-1617, 1971
95. Vanik PE, Davis HS: Cardiac arrhythmias during halothane anesthesia. *Anesth Analg* 47:299-307, 1968
96. Harrison DC: Cost containment in medicine: Why cardiology? *Am J Cardiol* 56:10C-15C, 1985
97. Kannel WB, McGee D, Gordon T: A general cardiovascular risk profile: The Framingham Study. *Am J Cardiol* 38:46-51, 1976
98. Wroblewski F, La Due JS: Myocardial infarction adds a postoperative complication of major surgery. *JAMA* 150:1212-1216, 1952
99. Sapala JA, Ponka JL, Duvernoy WFC: Operative and nonoperative risks in the cardiac patient. *J Am Geriatr Soc* 23:529-534, 1975
100. Dack S: Symposium on cardiovascular-pulmonary problems before and after surgery: Postoperative problems. *Am J Cardiol* 12:423-430, 1963
101. Carliner NH, Fisher ML, Plotnick GD, Garbart H, Rapoport A, Kelemen MH, Moran GW, Gadacz T, Peters RW: Routine preoperative exercise testing in patients undergoing major non-cardiac surgery. *Am J Cardiol* 56:51-57, 1985
102. Gerson MC, Hurst JM, Hertzberg VS, Doogan PA, Cochran MB, Lim SP, McCall N, Adolph RJ: Cardiac prognosis in non-cardiac geriatric surgery. *Ann Intern Med* 103:832-837, 1985
103. Gage AA, Bhayana JN, Balu V, Hook N: Assessment of cardiac risk in surgical patients. *Arch Surg* 112:1488-1492, 1977
104. Cutler BS, Wheeler HB, Paraskos JA, Cardullo PA: Assessment of operative risk with electrocardiographic exercise testing in patients with peripheral vascular disease. *Am J Surg* 137:484-490, 1979
105. Cutler BS, Wheeler HB, Paraskos JA, Cardullo PA: Applicability and interpretation of electrocardiographic stress testing in patients with peripheral vascular disease. *Am J Surg* 141:501-505, 1981
106. Pasternack PF, Imparato AM, Bear G, Baumann FG, Benjamin D, Sanger J, Kramer E, Wood RP: The value of radionuclide angiography as a predictor of perioperative myocardial infarction in patients undergoing abdominal aortic aneurysm resection. *J Vasc Surg* 1:320-325, 1984
107. Pasternack PF, Imparato AM, Riles TS, Baumann FG, Bear G, Lamparello PJ, Benjamin D, Sanger J, Kramer E: The value of the radionuclide angiogram in the prediction of perioperative myocardial infarction in patients undergoing lower extremity revascularization procedures. *Circulation* 72 (suppl II):II-13-II-17, 1985
108. Cutler BS, Leppo JA: Dipyridamole thallium 201 scintigraphy to detect coronary artery disease before abdominal aortic surgery. *J Vasc Surg* 5:91-100, 1987
109. Leppo J, Plaja J, Gionet M, Tumolo J, Paraskos JA, Cutler BS: Noninvasive evaluation of cardiac risk before elective vascular surgery. *J Am Coll Cardiol* 9:269-276, 1987
110. Eagle KA, Singer DE, Brewster DC, Darling RC, Mulley AG, Boucher CA: Dipyridamole-thallium scanning in patients undergoing vascular surgery. *JAMA* 257:2185-2189, 1987
111. Brewster DC, Okada RD, Strauss HW, Abbott WM, Darling RC,

- Boucher CA: Selection of patients for preoperative coronary angiography: Use of dipyridamole-stress-thallium myocardial imaging. *J Vasc Surg* 2:504-510, 1985
112. Slogoff S, Keats AS: Does perioperative myocardial ischemia lead to postoperative myocardial infarction? *ANESTHESIOLOGY* 62: 107-114, 1985
  113. Kaplan JA, Wells PH: Early diagnosis of myocardial ischemia using the pulmonary arterial catheter. *Anesth Analg* 60:789-793, 1981
  114. Mangano DT: Anesthetics, coronary artery disease, and outcome: Unresolved controversies (editorial). *ANESTHESIOLOGY* 70:175-178, 1989
  115. Hickey RF, Sybert PE, Verrier ED, Cason BA: Effects of halothane, enflurane, and isoflurane on coronary blood flow autoregulation and coronary vascular reserve in the canine heart. *ANESTHESIOLOGY* 68:21-30, 1987
  116. Priebe H-J: Differential effect of isoflurane on right and left ventricular performances, and on coronary, systemic, and pulmonary hemodynamics in the dog. *ANESTHESIOLOGY* 66:262-272, 1987
  117. Sill JC, Bove AA, Nugent M, Blaise GA, Dewey JD, Grabau C: Effects of isoflurane on coronary arteries and coronary arterioles in the intact dog. *ANESTHESIOLOGY* 66:273-279, 1987
  118. Buffington CW, Romson JL, Levine A, Duttlinger NC, Huang AH: Isoflurane induces coronary steal in a canine model of chronic coronary occlusion. *ANESTHESIOLOGY* 66:280-292, 1987
  119. Buffington CW, Davis KB, Gillispie S, Pettinger M: The prevalence of steal-prone coronary anatomy in patients with coronary artery disease: An analysis of the Coronary Artery Surgery Study registry. *ANESTHESIOLOGY* 69:721-727, 1988
  120. Slogoff S, Keats AS, Ott E: Preoperative propranolol therapy and aortocoronary bypass operation. *JAMA* 240:1487-1490, 1978
  121. Magnusson J, Thulin T, Werner O, Jarhult J, Thomson D: Hemodynamic effects of pretreatment with metoprolol in hypertensive patients undergoing surgery. *Br J Anaesth* 58:251-260, 1986
  122. Cucchiara RF, Benefiel DJ, Matteo RS, DeWood M, Albin MS: Evaluation of esmolol in controlling increases in heart rate and blood pressure during endotracheal intubation in patients undergoing carotid endarterectomy. *ANESTHESIOLOGY* 65:528-531, 1986
  123. Slogoff S, Keats AS: Does chronic treatment with calcium entry blocking drugs reduce perioperative myocardial ischemia? *ANESTHESIOLOGY* 68:676-680, 1988
  124. Waller BF, Palumbo PJ, Lie JT, Roberts WC: Status of the coronary arteries at necropsy in diabetes mellitus with onset after age 30 years: Analysis of 229 diabetic patients with and without clinical evidence of coronary heart disease and comparison to 183 control subjects. *Am J Med* 69:498-506, 1980
  125. Rennert G, Saltz-Rennert H, Wanderman K, Weitzman S: Size of acute myocardial infarcts in patients with diabetes mellitus. *Am J Cardiol* 55:1629-1630, 1985
  126. Djokovic JL, Hedley-Whyte J: Prediction of outcome of surgery and anesthesia in patients over 80. *JAMA* 242:2301-2306, 1979
  127. Wells P, Kaplan JA: Optimal management of patients with ischemic heart disease for noncardiac surgery by complementary anesthesiologist and cardiologist interaction. *Am Heart J* 102: 1029-1037, 1981
  128. Eerola M, Eerola R, Kaukinen S, Kaukinen L: Risk factors in surgical patients with verified preoperative myocardial infarction. *Acta Anaesthesiol Scand* 24:219-223, 1980
  129. Riles TS, Kopelman I, Imparato AM: Myocardial infarction following carotid endarterectomy: A review of 683 operations. *Surgery* 85:249-252, 1979
  130. Knight AA, Hollenberg M, London MJ, Mangano DT, S.P.I. Research Group: Myocardial ischemia in patients awaiting coronary artery bypass grafting. *Am Heart J* 117:1189-1196, 1989
  131. Detsky AS, Abrams HB, Forbath N, Scott JG, Hilliard JR: Cardiac assessment for patients undergoing noncardiac surgery: A multifactorial clinical risk index. *Arch Intern Med* 146:2131-2134, 1986
  132. Goldstein A Jr, Keats AS: The risk of anesthesia. *ANESTHESIOLOGY* 33:130-143, 1970
  133. Hulley SB, Cummings SR: *Designing Clinical Research. An Epidemiologic Approach*. Baltimore, Williams & Wilkins, 1988
  134. Port S, Cobb FR, Coleman RE, Jones RH: Effect of age on the response of the left ventricular function to exercise. *N Engl J Med* 303:1133-1137, 1980
  135. Fleg HR, Gerstenblith G, Lakatta EG: *Pathophysiology of the aging in heart circulation, Cardiovascular Disease in the Elderly*. Edited by Messerli F. Boston, Martinus Nijhoff, 1984, pp 11-34
  136. Weisfeldt ML: Aging of the cardiovascular system (editorial). *N Engl J Med* 303:1172-1174, 1980
  137. Bertrand YM, Boelens D, Collin L, De Meulder A, Engelbienne P, Ferrant E, Phillippe A, Reynaert M, Stainier M, Van Loo E: Preoperative assessment in geriatric patients for elective surgery. *Acta Anaesthesiol Belg* 35 (Suppl):155-165, 1984
  138. Drucker WR, Gavett JW, Kirshner R, Messick WJ, Ingersoll G: Toward strategies for cost containment in surgical patients. *Ann Surg* 198:284-300, 1983
  139. Harbrecht PJ, Garrison RN, Fry DE: The impact of demographic trends on hospital surgical care. *Am J Surg* 50:270-274, 1984
  140. Cullen DJ, Ferrara LC, Briggs BA, Walker PF, Gilbert J: Survival, hospitalization charges and follow-up results in critically ill patients. *N Engl J Med* 294:982-987, 1976
  141. Roberts AJ, Woodhall DD, Conti CR, Ellison DW, Fisher R, Richards C, Marks RG, Knauf DG, Alexander JA: Mortality, morbidity, and cost-accounting related to coronary artery bypass graft surgery in the elderly. *Ann Thorac Surg* 39:426-432, 1985
  142. Greenberg AG, Saik RP, Pridham D: Influence of age on mortality of colon surgery. *Am J Surg* 150:65-70, 1985
  143. Mohr DN: Estimation of surgical risk in the elderly: A correlative review. *J Am Geriatr Soc* 31:99-102, 1983
  144. Goldman L: Cardiac risks and complications of noncardiac surgery. *Ann Intern Med* 98:504-513, 1983
  145. Lowenstein E, Yusuf S, Teplick R: Perioperative myocardial reinfarction: A glimmer of hope—A note of caution (editorial). *ANESTHESIOLOGY* 59:493-494, 1983
  146. Diamond GA, Forrester JS: Analysis of probability as an aid in the clinical diagnosis of coronary artery disease. *N Engl J Med* 300:1350-1358, 1979
  147. Larsen SF, Olesen KH, Jacobsen E, Nielsen J, Nielsen AL, Pietersen A, Pedersen OJ, Waaben J, Kehlet H, Hansen JF, Dalgard P, Nyboe J: Prediction of cardiac risk in noncardiac surgery. *Eur Heart J* 8:179-185, 1987
  148. Stone PH, Turi ZG, Muller JE, Parker C, Hartwell T, Rutherford JD, Jaffe AS, Raabe DS, Passamani ER, Willerson JT, Sobel BE, Robertson TL, Braunwald E, and the MILIS Study Group: Prognostic significance of the treadmill exercise test performance 6 months after myocardial infarction. *J Am Coll Cardiol* 8:1007-1017, 1986
  149. Bigger JT Jr, Fleiss JL, Kleiger R, Miller JP, Rolnitzky LM, and the Multicenter Post-Infarction Research Group: The relationships among ventricular arrhythmias, left ventricular dysfunction

- tion, and mortality in the 2 years after myocardial infarction. *Circulation* 69:250-258, 1984
150. Multicenter Post-Infarction Research Group: Risk stratification and survival after myocardial infarction. *N Engl J Med* 309: 331-336, 1983
151. Sanz G, Castañer A, Betriu A, Magriña J, Roig E, Coll S, Paré JC, Navarro-López F: Determinants of prognosis in survivors of myocardial infarction: a prospective clinical angiographic study. *N Engl J Med* 306:1065-1070, 1982
152. Moraski RE, Russell RO Jr, Smith M, Rackley CE: Left ventricular function in patients with and without myocardial infarction and one, two, or three vessel coronary artery disease. *Am J Cardiol* 35:1-10, 1975
153. Cooperman M, Pflug B, Martin EW Jr, Evans WE: Cardiovascular risk factors in patients with peripheral vascular disease. *Surgery* 84:505-509, 1978
154. Kannel WB, Sorlie P: Hypertension in Framingham, Epidemiology and Control of Hypertension. Edited by Paul O. Miami, Florida, Symposia Specialist, 1975, pp 553-593
155. The 1988 Joint National Committee: The 1988 report of the Joint National Committee on detection, evaluation, and treatment of high blood pressure. *Arch Intern Med* 148:1023-1038, 1988
156. Pooling Project Research Group: Relationship of blood pressure, serum cholesterol, smoking habit, relative weight and ECG abnormalities to incidence of major coronary events: Final report of the Pooling Project. *J Chronic Dis* 31:201-306, 1978
157. Kannel WB, Thom TJ: Declining cardiovascular mortality. *Circulation* 70:331-336, 1984
158. Veterans Administration Cooperative Study Group on Antihypertensive Agents: Effects of treatment on morbidity in hypertension: I. Results in patients with diastolic blood pressure averaging 115-129 mmHg. *JAMA* 202:1028-1034, 1967
159. Veterans Administration Cooperative Study Group on Antihypertensive Agents: Effects of treatment on morbidity in hypertension: II. Results in patients with diastolic blood pressure averaging 90-119 mmHg. *JAMA* 213:1143-1152, 1970
160. Hypertension Detection and Follow-up Program Cooperative Group: Five-year findings of the hypertension detection and follow-up program: I. Reduction in mortality of persons with high blood pressure, including mild hypertension. *JAMA* 242: 2562-2572, 1979
161. Management Committee of the Australian National Blood Pressure Study: The Australian therapeutic trial in mild hypertension. *Lancet* 1:1261-1267, 1980
162. Prys-Roberts C, Meloche R, Foëx P: Studies of anaesthesia in relation to hypertension: I. Cardiovascular responses to treated and untreated patients. *Br J Anaesth* 43:122-137, 1971
163. Schneider AJL: Assessment of risk factors and surgical outcome. *Surg Clin North Am* 63:1113-1125, 1983
164. Smithwick RH, Thompson JE: Splanchnicectomy for essential hypertension. *JAMA* 152:1501, 1953
165. Prys-Roberts C: Hypertension and anesthesia—Fifty years on (editorial). *ANESTHESIOLOGY* 50:281-284, 1979
166. Sprague HB: The heart in surgery. An analysis of results of surgery on cardiac patients during the past ten years at the Massachusetts General Hospital. *Surg Gynecol Obstet* 49:54-58, 1929
167. Asiddao CB, Donegan JH, Whitesell RC, Kalbfleisch JH: Factors associated with perioperative complications during carotid endarterectomy. *Anesth Analg* 61:631-637, 1982
168. Bruce DL, Croley TF, Lee JS: Preoperative clonidine withdrawal syndrome. *ANESTHESIOLOGY* 51:90-92, 1979
169. Foëx P: Beta-blockade in anaesthesia. *J Clin Hosp Pharm* 8:183-190, 1983
170. Kaplan JA, Dunbar RW, Bland JW Jr, Sumpter R, Jones EL: Propranolol and cardiac surgery: A problem for the anesthesiologist. *Anesth Analg* 54:571-578, 1975
171. Miller RR, Olson HG, Amsterdam EA, Mason DT: Propranolol-withdrawal rebound phenomenon. Exacerbation of coronary events after abrupt cessation of anti-anginal therapy. *N Engl J Med* 293:416-418, 1975
172. Engelman RM, Hadji-Rousou I, Breyer RH, Whittredge P, Harbison W, Chircop RV: Rebound vasospasm after coronary revascularization in association with calcium antagonist withdrawal. *Ann Thorac Surg* 37:469-472, 1984
173. Goldman L, Caldera DL: Risks of general anesthesia and elective operation in the hypertensive patient. *ANESTHESIOLOGY* 50: 285-292, 1979
174. Kannel WB, McGee DL: Diabetes and cardiovascular risk factors: The Framingham Study. *Circulation* 59:8-13, 1979
175. Beard OW, Hipp HR, Robins M, Verzeloni VR: Initial myocardial infarction among veterans: Ten-year survival. *Am Heart J* 73: 317-321, 1967
176. Chiariello M, Indolfi C, Cotecchia MR, Sifola C, Romano M, Condorelli M: Asymptomatic transient ST changes during ambulatory ECG monitoring in diabetic patients. *Am Heart J* 110: 529-534, 1985
177. Abenavoli T, Rubler S, Fisher VJ, Axelrod HI, Zuckerman KP: Exercise testing with myocardial scintigraphy in asymptomatic diabetic males. *Circulation* 63:54-64, 1981
178. Niakan E, Harati Y, Rolak LA, Comstock JP, Rokey R: Silent myocardial infarction and diabetic cardiovascular autonomic neuropathy. *Arch Intern Med* 146:2229-2230, 1986
179. Fein FS, Sonnenblick EH: Diabetic cardiomyopathy. *Prog Cardiovasc Dis* 27:255-270, 1985
180. Kahn JK, Zola B, Juni JE, Vinik AI: Radionuclide assessment of left ventricular diastolic filling in diabetes mellitus with and without cardiac autonomic neuropathy. *J Am Coll Cardiol* 7: 1303-1309, 1986
181. Burgos LG, Ebert TJ, Asiddao C, Turner LA, Pattison CZ, Wang-Cheng R, Kampine JP: Increased intraoperative cardiovascular morbidity in diabetics with autonomic neuropathy. *ANESTHESIOLOGY* 70:591-597, 1989
182. Olson HG, Lyons KP, Troope P, Butman S, Piters KM: The high-risk acute myocardial infarction patient at 1-year follow-up: Identification at hospital discharge by ambulatory electrocardiography and radionuclide ventriculography. *Am Heart J* 107:358-366, 1984
183. Bigger JT Jr, Fleiss JL, Kleiger R, Miller JP, Rolnitzky LM, and the Multicenter Post-Infarction Research Group: The relationships among ventricular arrhythmias, left ventricular dysfunction, and mortality in the 2 years after myocardial infarction. *Circulation* 69:250-258, 1984
184. Multicenter Post-Infarction Research Group: Risk stratification and survival after myocardial infarction. *N Engl J Med* 309: 331-336, 1983
185. Schultz RA Jr, Strauss HW, Pitt B: Sudden death in the year following myocardial infarction: Relation to ventricular premature contractions in the late hospital phase and left ventricular ejection fraction. *Am J Med* 62:192-199, 1976
186. Vismara LA, Amsterdam EA, Mason DT: Relation of ventricular arrhythmias in the late hospital phase of acute myocardial infarction to sudden death after hospital discharge. *Am J Med* 59:6-12, 1975
187. McGovern B: Hypokalemia and cardiac arrhythmias. *ANESTHESIOLOGY* 63:127-129, 1985
188. Venkataraman K, Madias JE, Hood WB: Indications for prophylactic preoperative insertion of pacemakers in patients with

- right bundle branch block and left anterior hemi-block. *Chest* 68:501-506, 1975
189. Rooney SM, Goldiner PL, Muss E: Relationship of right bundle-branch block and marked left axis deviation to complete heart block during general anesthesia. *ANESTHESIOLOGY* 44:64-66, 1976
  190. Skinner JF, Pearce ML: Surgical risk in the cardiac patient. *J Chronic Dis* 17:57-72, 1964
  191. Jensen J, Blankenhorn DH, Kornerup V: Coronary disease in familial hypercholesterolemia. *Circulation* 36:77-82, 1967
  192. Anderson KM, Castelli WP, Levy D: Cholesterol and mortality: 30 years of follow-up from the Framingham Study. *JAMA* 257: 2176-2180, 1987
  193. Stamler J, Wentworth D, Neaton JD, for the MRFIT Research Group: Is relationship between serum cholesterol and risk premature death from coronary heart disease continuous and graded? Findings in 356,222 primary screenings of the Multiple Risk Factor Intervention Trial (MRFIT). *JAMA* 256:2823-2828, 1986
  194. Frick MH, Elo O, Haapa K, Heinonen OP, Heinsalmi P, Helo P, Huttunen JK, Kaitaniemi P, Koshinen P, Manninen V, Mäenpää H, Mäklönen M, Mänttari M, Norola S, Pasternack A, Pikkariainen J, Romo M, Sjöblom T, Nikkilä EA: Helsinki Heart Study: Primary prevention trial with gemfibrozil in middle-aged men with dyslipidemia. Safety of treatment, changes in risk factors, and incidence of coronary heart disease. *N Engl J Med* 317:1237-1245, 1987
  195. Lipid Research Clinics Program: The Lipid Research Clinics Coronary Primary Prevention Trial results: I. Reduction in incidence of coronary heart disease. *JAMA* 251:351-364, 1984
  196. Lipid Research Clinics Program: The Lipid Research Clinics Coronary Primary Prevention Trial results: II. The relationship of reduction in incidence of coronary heart disease to cholesterol lowering. *JAMA* 251:365-374, 1984
  197. Nicod P, Rehr R, Winniford MD, Campbell WB, Firth BG, Hillis LD: Acute systemic and coronary hemodynamic and serologic responses to cigarette smoking in long-term smokers with atherosclerotic coronary artery disease. *J Am Coll Cardiol* 4:964-971, 1984
  198. Klein LW: Cigarette smoking, atherosclerosis and the coronary hemodynamic response: A unifying hypothesis. *J Am Coll Cardiol* 4:972-974, 1984
  199. Reul GJ Jr, Cooley DA, Duncan JM, Frazier OH, Ott DA, Livesay JJ, Walker WE: The effect of coronary bypass on the outcome of peripheral vascular operations in 1,093 patients. *J Vasc Surg* 3:788-798, 1986
  200. Mahar LJ, Steen PA, Tinker JH, Vlietstra RE, Smith HC, Pluth JR: Perioperative myocardial infarction in patients with coronary artery disease with and without aorta-coronary bypass grafts. *J Thorac Cardiovasc Surg* 76:533-537, 1978
  201. Diehl JT, Cali RF, Hertzner NR, Bevan EG: Complications of abdominal aortic reconstruction: An analysis of perioperative risk factors in 557 patients. *Ann Surg* 197:49-56, 1983
  202. Read RC, Murphy ML, Hultgren HN, Takaro T: Survival of men treated for chronic stable angina pectoris. A cooperative randomized study. *J Thorac Cardiovasc Surg* 75:1-16, 1978
  203. Scher KS, Tice DA: Operative risk in patients with previous coronary artery bypass. *Arch Surg* 111:807-809, 1976
  204. McCollum CH, Garcia-Rinaldi R, Graham JM, Debaek ME: Myocardial revascularization prior to subsequent major surgery in patients with coronary artery disease. *Surgery* 81:302-304, 1977
  205. Crawford ES, Morris GC, Howell JF, Flynn WF, Moorhead DT: Operative risk in patients with previous coronary artery bypass. *Ann Thorac Surg* 26:215-221, 1978
  206. Kimbris D, Segal BL: Coronary disease progression in patients with and without saphenous vein bypass surgery. *Am Heart J* 102:811-818, 1981
  207. Dorros G, Cowley MJ, Simpson J, Bentivoglio LG, Block PC, Bourassa M, Detre K, Gosselin AJ, Gruntzig AR, Kelsey SF, Kent KM, Mock MB, Mullin SM, Myler RK, Passamani ER, Stertz SH, Williams DO: Percutaneous transluminal coronary angioplasty: Report of complications from the National Heart, Lung, and Blood Institute PTCA registry. *Circulation* 67:723-730, 1983
  208. Ryan TJ, Faxon DP, Gunnar RM, Kennedy JW, King SB III, Loop FD, Peterson KL, Reeves TJ, Williams DO, Winters WL Jr: Guidelines for percutaneous transluminal coronary angioplasty. A report of the American College of Cardiology/American Heart Association Task Force on assessment of diagnostic and therapeutic cardiovascular procedures (Subcommittee on percutaneous transluminal coronary angioplasty). *J Am Coll Cardiol* 12:529-545, 1988
  209. Talley JD, Hurst JW, King SB III, Douglas JS Jr, Roubin GS, Gruentzig AR, Anderson HV, Weintraub WS: Clinical outcome 5 years after attempted percutaneous transluminal coronary angioplasty in 427 patients. *Circulation* 77:820-829, 1988
  210. The American Journal of Cardiology: A Symposium: Interventional Cardiology—1987. Edited by Baim DS. *Am J Cardiol* 61:1G-117G, 1988
  211. Chung F, Houston PL, Cheng DCH, Lavelle PA, McDonald N, Burns RJ, David TE: Calcium channel blockade does not offer adequate protection from perioperative myocardial ischemia. *ANESTHESIOLOGY* 69:343-347, 1988
  212. Flacke JW, Bloor BC, Flacke WE, Wong D, Dazza S, Stead SW, Laks H: Reduced narcotic requirement by clonidine with improved hemodynamic and adrenergic stability in patients undergoing coronary bypass surgery. *ANESTHESIOLOGY* 67:11-19, 1987
  213. Ghignone M, Calvillo, Quintin KL: Anesthesia and hypertension: The effect of clonidine on perioperative hemodynamics and isoflurane requirements. *ANESTHESIOLOGY* 67:3-10, 1987
  214. Longnecker DE: Alpine anesthesia: Can pretreatment with clonidine decrease the peaks and valleys? (editorial) *ANESTHESIOLOGY* 67:1-2, 1987
  215. American Society of Anesthesiologists: New classification of physical status. *ANESTHESIOLOGY* 24:111, 1963
  216. Braunwald E: The history, Heart Disease: A Textbook of Cardiovascular Medicine. Edited by Braunwald E. Philadelphia, W.B. Saunders, 1984, pp 1-13
  217. Lewin I, Lerner AG, Green SH, Del Guercio LRM, Siegel JH: Physical class and physiological status in the prediction of operative mortality in the aged sick. *Ann Surg* 174:217-231, 1971
  218. Rabkin SW, Horne JM: Preoperative electrocardiography: Its cost-effectiveness in detecting abnormalities when a previous tracing exists. *Can Med Assoc J* 121:301-306, 1979
  219. Baers S, Nakhjavan F, Kajani M: Postoperative myocardial infarction. *Surg Gynecol Obstet* 120:315-322, 1965
  220. Hunter PR, Endrey-Waler P, Bauer GE, Stephen FO: Myocardial infarction following surgical operations. *Br Med J* 4:725-728, 1968
  221. Carlner NH, Fisher ML, Plotnick GD, Moran GW, Kelemen MH, Gadacz TR, Peters RW: The preoperative electrocardiogram as an indicator of risk in major noncardiac surgery. *Can J Cardiol* 2:134-137, 1986
  222. Goldberger AL, O'Konski M: Utility of routine electrocardiogram before surgery and on general hospital admission: Critical review and guidelines. *Ann Intern Med* 105:552-557, 1986
  223. Goldman L, Caldera DL, Southwick FS, Nussbaum SR, Murray B, O'Malley TA, Goroll AH, Caplan CH, Nolan J, Burke DS,

- Krogstad D, Carabello B, Slater EE: Cardiac risk factors and complications in non-cardiac surgery. *Medicine* 57:357-370, 1978
224. Mangano DT: Preoperative assessment, Cardiac Anesthesia Vol. 1, Second Edition. Edited by Kaplan JA. New York, Grune & Stratton, 1987, pp 341-392
225. Dagenais GR, Rouleau JR, Christen A, Fabia J: Survival of patients with strongly positive exercise electrocardiogram. *Circulation* 65:452-456, 1982
226. Weiner DA, McCabe CH, Ryan TJ: Prognostic assessment of patients with coronary artery disease by exercise testing. *Am Heart J* 105:749-755, 1983
227. Schneider RM, Seaworth JF, Dohrmann ML, Lester RM, Phillips HR Jr, Bashore TM, Baker JT: Anatomic and prognostic implications of an early positive treadmill exercise test. *Am J Cardiol* 50:682-688, 1982
228. Cohn PF, Lawson WE: Characteristics of silent myocardial ischemia during out-of-hospital activities in asymptomatic angiographically documented coronary-artery disease. *Am J Cardiol* 59:746-749, 1987
229. Coy KM, Imperi GA, Lambert CR, Pepine CJ: Silent myocardial ischemia during daily activities in asymptomatic men with positive exercise test responses. *Am J Cardiol* 59:45-49, 1987
230. Rocco MB, Barry J, Campbell S, Nabel E, Cook EF, Goldman L, Selwyn AP: Circadian variation of transient myocardial ischemia in patients with coronary artery disease. *Circulation* 75:395-400, 1987
231. Shea MJ, Deanfield JE, Wilson R, deLandsheere C, Jones T, Selwyn AP: Transient ischemia in angina pectoris: Frequent silent events with every-day activities. *Am J Cardiol* 56:34E-38E, 1985
232. Cecchi AC, Dovellini EV, Marchi F, Pucci P, Santoro GM, Fazzini PF: Silent myocardial ischemia during ambulatory electrocardiographic monitoring in patients with effort angina. *J Am Coll Cardiol* 1:934-939, 1983
233. Chierchia S, Lazzari M, Freedman B, Brunelli C, Maseri A: Impairment of myocardial perfusion and function during painless myocardial ischemia. *J Am Coll Cardiol* 1:924-930, 1983
234. Campbell S, Barry J, Rebecca GS, Rocco MB, Nable EG, Wayne RR, Selwyn AP: Active transient myocardial ischemia during daily life in asymptomatic patients with positive exercise tests and coronary-artery disease. *Am J Cardiol* 57:1010-1016, 1986
235. Nishimura RA, Reeder GS, Miller FA Jr, Ilstrup DM, Shub C, Seward JB, Tajik AJ: Prognostic value of predischARGE 2-dimensional echocardiogram after acute myocardial infarction. *Am J Cardiol* 53:429-432, 1984
236. Erbel R, Borner N, Steller D, Brunier J, Thelen M, Pfelffer C, Mohr-Kahaly S, Iversen S, Oelert H, Meyer J: Detection of aortic dissection by transesophageal echocardiography. *Br Heart J* 58:45-51, 1987
237. Koenig K, Kasper W, Hofmann T, Meinertz T, Just H: Transesophageal echocardiography for diagnosis of rupture of the ventricular septum or left ventricular papillary muscle during acute myocardial infarction. *Am J Cardiol* 59:362, 1987
238. Erbel R, Rohmann S, Drexler M, Mohr-Kahaly S, Gerharz CD, Iversen S, Oelert H, Meyer J: Improved diagnostic value of echocardiography in patients with infective endocarditis by transesophageal approach: A prospective study. *Eur Heart J* 9:43-53, 1988
239. Gussenhoven EJ, Taams MA, Roelandt JRTC, Ligtoet KM, McGhie J, van Herwerden LA, Cahalan MK: Transesophageal two-dimensional echocardiography: Its role in solving clinical problems. *J Am Coll Cardiol* 8:975-979, 1986
240. Seward JB, Khandheria BK, Oh JK, Abel MD, Hughes RW, Edwards WD, Nichols BA, Freeman WK, Tajik AJ: Transesophageal echocardiography: Technique, anatomic correlations, implementation, and clinical applications. *Mayo Clin Proc* 63:649-680, 1988
241. Stokely EM, Buja LM, Lewis SE, Parkey RW, Bonte FJ, Harris RA Jr, Willerson JT: Measurement of acute myocardial infarcts in dogs with <sup>99m</sup>Tc-stannous pyrophosphate scintigrams. *J Nucl Med* 17:1-5, 1975
242. Buja LM, Parkey RW, Dees JH, Stokely EM, Harris RA Jr, Bonte EJ, Willerson JT: Morphologic correlates of technetium-99m stannous pyrophosphate imaging of acute myocardial infarcts in dogs. *Circulation* 52:596-607, 1975
243. Holman BL, Wynne J: Infarct avid (hot-spot) myocardial scintigraphy. *Radiol Clin North Am* 18:487-499, 1980
244. Cahalan MK, Litt L, Botvinick EH, Schiller NB: Advances in noninvasive cardiovascular imaging: Implications for the anesthesiologist. *ANESTHESIOLOGY* 66:356-372, 1987
245. Dash H, Massie BM, Botvinick EH, Brundage BH: The noninvasive identification of left main and three vessel coronary artery disease by myocardial stress perfusion scintigraphy and treadmill exercise electrocardiography. *Circulation* 60:276-284, 1979
246. Wackers FJT, Fetterman RC, Mattered JA, Clements JP: Quantitative planar thallium-201 stress scintigraphy: A critical evaluation of the method. *Semin Nucl Med* 15:46-66, 1985
247. Leppo J, Boucher CA, Okada RD, Newell JB, Strauss HW, Pohost GM: Serial thallium-201 myocardial imaging after dipyridamole infusion: Diagnostic utility in detecting coronary stenoses and relationship to regional wall motion. *Circulation* 66:649-657, 1982
248. Leppo JA, O'Brien J, Rothendler JA, Getchell JD, Lee VW: Dipyridamole-thallium-201 scintigraphy in the prediction of future cardiac events after acute myocardial infarction. *N Engl J Med* 310:1014-1018, 1984
249. Strauss HW, Elmaleh D: Musings on PET and SPECT. *Circulation* 73:611-614, 1986
250. Brunken R, Tillisch J, Schwaiger M, Child JS, Marshall R, Mandelkern M, Phelps ME, Shelbert HR: Regional perfusion and wall motion in patients with chronic electrocardiographic Q-wave infarctions: Evidence for persistence of viable tissue in some infarct regions by positron emission tomography. *Circulation* 73:951-963, 1986
251. Eagle KA, Coley CM, Newell JB, Brewster DC, Darling RC, Strauss HW, Guiney TE, Boucher CA: Combining clinical and thallium data optimizes preoperative assessment of cardiac risk before major vascular surgery. *Ann Intern Med* 110:859-866, 1989
252. London MJ, Tubau JF, Harris D, Hollenberg M, Browner W, Massie B, Mangano DT: Dipyridamole thallium imaging predicts intraoperative ischemia in patients undergoing major vascular surgery (abstract). *J Am Coll Cardiol* 11:162A, 1988
253. Pflugfelder PW, Wisenberg G, Prato FS, Carroll SE, Turner KL: Early detection of canine myocardial infarction by magnetic resonance imaging *in vivo*. *Circulation* 71:587-594, 1985
254. McNamara MT, Higgins CB, Schechtman N, Botvinick E, Lipton MJ, Chatterjee K, Amparo EG: Detection and characterization of acute myocardial infarction in man with use of gated magnetic resonance. *Circulation* 71:717-724, 1985
255. Higgins CB, Lanzer P, Stark D, Botvinick E, Schiller NB, Crooks L, Kaufman L, Lipton MJ: Imaging by nuclear magnetic resonance in patients with chronic ischemic heart disease. *Circulation* 69:523-531, 1984
256. Higgins CB, Byrd BF, Farmer DW, Osaki L, Silverman NH, Cheitlin MD: Magnetic resonance imaging in patients with congenital heart disease. *Circulation* 70:851-860, 1984
257. Junod FL, Harlan BJ, Payne J, Smeloff EA, Miller GE Jr, Kelly PB Jr, Ross KA, Shankar KC, McDermott JP: Preoperative risk

- assessment in cardiac surgery: Comparison of predicted and observed results. *Ann Thorac Surg* 43:59-64, 1987
258. Alderman EL, Fisher LD, Litwin P, Kaiser GC, Myers WO, Maynard C, Levine F, Schloss M: Results of coronary artery surgery in patients with poor left ventricular function (CASS). *Circulation* 68:785-795, 1983
  259. Kennedy JW, Kaiser GC, Fisher LD, Maynard C, Fritz JK, Myers W, Mudd JG, Ryan TJ, Coggin J: Multivariate discriminant analysis of the clinical and angiographic predictors of operative mortality from the Collaborative Study in Coronary Artery Surgery (CASS). *J Thorac Cardiovasc Surg* 80:876-887, 1980
  260. Myers WO, Gersh BJ, Fisher LD, Mock MB, Holmes DR, Schaff HV, Gillispie S, Ryan TJ, Kaiser GC, and other CASS Investigators: Medical versus early surgical therapy in patients with triple-vessel disease and mild angina pectoris: A CASS registry study of survival. *Ann Thorac Surg* 44:471-486, 1987
  261. Myers WO, Davis K, Foster ED, Maynard C, Kaiser GC: Surgical survival in the Coronary Artery Surgery Study (CASS) registry. *Ann Thorac Surg* 40:245-260, 1985
  262. Veterans Administration Coronary Artery Bypass Surgery Co-operative Study Group: Eleven-year survival in the Veterans Administration randomized trial of coronary bypass surgery for stable angina. *N Engl J Med* 311:1333-1339, 1984
  263. Chaitman BR, Fisher LD, Bourassa MG, Davis K, Rogers WJ, Maynard C, Tyras DH, Berger RL, Judkins MP, Ringqvist I, Mock MB, Killip T, and Participating CASS Medical Centers: Effect of coronary bypass surgery on survival patterns in subsets of patients with left main coronary artery disease. Report of the Collaborative Study in Coronary Artery Surgery (CASS). *Am J Cardiol* 48:765-777, 1981
  264. Backer CL, Tinker JH, Robertson DM, Vlietstra RE: Myocardial reinfarction following local anesthesia for ophthalmic surgery. *Anesth Analg* 59:257-262, 1980
  265. Prough DS, Scuderi PE, Stullken E, Davis CH Jr: Myocardial infarction following regional anesthesia for carotid endarterectomy. *Can Anaesth Soc J* 31:192-196, 1984
  266. Erlik D, Valero A, Birkhan J, Gersh I: Prostatic surgery and the cardiovascular patient. *Br J Urol* 40:53-61, 1968
  267. McGowen SW, Smith GFN: Anesthesia for transurethral prostatectomy: A comparison of spinal intradural analgesia with two methods of general anesthesia. *Anaesthesia* 35:847-853, 1980
  268. McAuley CE, Watson CG: Elective inguinal herniorrhaphy after myocardial infarction. *Surg Gynecol Obstet* 159:36-38, 1984
  269. Yeager MP, Glass DD, Neff RK, Brinck-Johnsen T: Epidural anesthesia and analgesia in high-risk surgical patients. *ANESTHESIOLOGY* 66:729-736, 1987
  270. Merin RG: Is anesthesia beneficial for the ischemic heart? (editorial). *ANESTHESIOLOGY* 53:439-440, 1980
  271. Merin RG: Is anesthesia beneficial for the ischemic heart? II (editorial). *ANESTHESIOLOGY* 55:341-342, 1981
  272. Merin RG, Lowenstein E, Gelman S: Is anesthesia beneficial for the ischemic heart? III (editorial). *ANESTHESIOLOGY* 64:137-140, 1986
  273. Slogoff S, Keats AS: Randomized trial of primary anesthetic agents on outcome of coronary bypass operations. *ANESTHESIOLOGY* 70:179-188, 1989
  274. Tuman KJ, McCarthy RJ, Spiess BD, Davalle M, Dabir R, Ivanovich AD: Does choice of anesthetic agent significantly affect outcome after coronary artery surgery? *ANESTHESIOLOGY* 70:189-198, 1989
  275. Merin RG, Basch S: Are the myocardial functional and metabolic effects of isoflurane really different from those of halothane and enflurane? *ANESTHESIOLOGY* 55:398-408, 1981
  276. Moffitt EA, Barker RA, Glen JJ, Imrie DD, DelCampo C, Landy-more RW, Kinley E, Murphy DA: Myocardial metabolism and hemodynamic responses with isoflurane anesthesia for coronary arterial surgery. *Anesth Analg* 65:53-61, 1986
  277. Gelman S, Fowler KC, Smith LR: Regional blood flow during isoflurane and halothane anesthesia. *Anesth Analg* 63:557-565, 1984
  278. Cason BA, Verrier ED, London MJ, Mangano DT, Hickey RF: Effects of isoflurane and halothane on coronary vascular resistance and collateral myocardial blood flow: Their capacity to induce coronary steal. *ANESTHESIOLOGY* 67:665-675, 1987
  279. Becker LC: Is isoflurane dangerous for the patient with coronary artery disease? (editorial). *ANESTHESIOLOGY* 66:259-261, 1987
  280. Goehner P, Hollenberg M, Leung J, Browner W, Cason B, Mangano DT: Hemodynamic control suppresses myocardial ischemia during isoflurane or sufentanil anesthesia for CABG (abstract). *ANESTHESIOLOGY* 69:A32, 1988
  281. Tarnow J, Marksches-Hornung A, Schulte-Sasse U: Isoflurane improves the tolerance to pacing-induced myocardial ischemia. *ANESTHESIOLOGY* 64:147-156, 1986
  282. O'Young J, Mastrocostopoulos G, Hilgenberg A, Palacios I, Kyritsis A, Lappas DG: Myocardial circulatory and metabolic effects of isoflurane and sufentanil during coronary artery surgery. *ANESTHESIOLOGY* 66:653-658, 1987
  283. Benefiel DJ, Roizen MF, Lampe GH, Sohn YJ, Fong KS, Irwin DH, Drasner K, Smith JS, Stoney RJ, Ehrenfeld WK, Goldstone JS, Reilly LM, Thisted RA, Eger EI II: Morbidity after aortic surgery with sufentanil vs. isoflurane anesthesia (abstract). *ANESTHESIOLOGY* 65:A516, 1986
  284. Thompson JE, Hollier LH, Patman RD, Persson AV: Surgical management of abdominal aortic aneurysms: Factors influencing mortality and morbidity—A 20-year experience. *Ann Surg* 181:654-661, 1975
  285. Hicks GL, Eastland MW, DeWeese JA, May AG, Rob CG: Survival improvement following aortic aneurysm resection. *Ann Surg* 181:863-869, 1975
  286. Roizen MF, Sohn YJ, Stoney RJ: Intraoperative management of the patient requiring supraceliac aortic occlusion, *Vascular Surgery: Principles and Practice*. Edited by Wilson SE, Veith FJ, Hobson RW Jr, Williams RA: McGraw-Hill, New York, 1987, pp 312-321
  287. Cogbill CL: Operation in the aged. *Arch Surg* 94:2202-2205, 1967
  288. Vacanti CJ, VanHouten RJ, Hill RC: A statistical analysis of the relationship of physical status to postoperative mortality in 68,388 cases. *Anesth Analg* 49:565-566, 1970
  289. Wyatt HL, Da Luz PL, Waters DD, Swan HJC, Forrester JS: Contrasting influences of alterations in ventricular preload and afterload upon systemic hemodynamics, function and metabolism of ischemic myocardium. *Circulation* 55:318-324, 1977
  290. Szekeres L, Udvary E: Hemodynamic factors influencing myocardial ischemia in a canine model of coronary artery stenosis: The effects of nitroglycerine. *Br J Pharmacol* 79:337-345, 1983
  291. Loeb HS, Saudye A, Croke RP, Talano JV, Klodnycky ML, Gunnar RM: Effects of pharmacologically-induced hypertension on myocardial ischemia and coronary hemodynamics in patients with fixed coronary obstruction. *Circulation* 57:41-46, 1978
  292. Lekven J, Kiil F: Myocardial function in general and regional left ventricular ischemia in dogs at control and high aortic blood pressure. *Cardiovasc Res* 9:378-383, 1975
  293. Buffington CW: Hemodynamic determinants of ischemic myocardial dysfunction in the presence of coronary stenosis in dogs. *ANESTHESIOLOGY* 63:651-662, 1985
  294. Dunn RB, Griggs DM Jr: Ventricular filling pressure as a determinant of coronary blood flow during ischemia. *Am J Physiol* 244:H429-H436, 1983
  295. Hillis LD, Izquierdo C, Davis C, Brotherton S, Eberhart R, Roan

- PG, Willerson JT: Effect of various degrees of systemic arterial hypertension on acute canine myocardial ischemia. *Am J Physiol* 240 (Heart Circ Physiol 9):H855-H861, 1981
296. Hoffman JIE: Determinants and prediction of transmural myocardial perfusion. *Circulation* 58:381-391, 1978
297. Marcus ML, Doty DB, Hiratzka LF, Wright CB, Eastham CL: Decreased coronary reserve—A mechanism for angina pectoris in patients with aortic stenosis and normal coronary arteries. *N Engl J Med* 307:1362-1367, 1982
298. Vatner SF, Higgins CB, Braunwald E: Effects of norepinephrine on coronary circulation and left ventricular dynamics in the conscious dog. *Circ Res* 34:812-823, 1974
299. Kelley KO, Feigl EO: Segmental  $\alpha$ -receptor-mediated vasoconstriction in the canine coronary circulation. *Circ Res* 43:908-916, 1978
300. Roizen MF, Hamilton WK, Sohn YJ: Treatment of stress-induced increases in pulmonary capillary wedge pressure using volatile anesthetics. *ANESTHESIOLOGY* 55:446-450, 1981
301. Wilkinson PL, Hamilton WK, Moyers JR, Graham BG, Ports TA, Ullyot DJ, Chatterjee K: Halothane and morphine-nitrous oxide anesthesia in patients undergoing coronary artery bypass operation. *J Thorac Cardiovasc Surg* 82:372-382, 1981
302. Leung J, O'Kelly B, Browner W, Tubau J, Mangano DT: Are regional wall motion abnormalities detected by transesophageal echocardiography triggered by acute changes in supply and demand? (abstract) *ANESTHESIOLOGY* 69:A801, 1988
303. Kotter G, Kotrly K, Kalbfleisch J, Vucins E, Kampine J: Myocardial ischemia during cardiovascular surgery as detected by an ST segment trend monitoring system. *J Cardiothorac Anes* 1:190-199, 1987
304. Hickey RF, Verrier ED, Baer RW, Vlahakes GJ, Fein G, Hoffman JIE: A canine model of acute coronary artery stenosis: Effects of deliberate hypotension. *ANESTHESIOLOGY* 59:226-236, 1985
305. Lowenstein E, Foëx P, Francis CM, Davies WL, Yusuf S, Ryder WA: Regional ischemic ventricular dysfunction in myocardium supplied by a narrowed coronary artery with increasing halothane concentration in the dog. *ANESTHESIOLOGY* 55:349-359, 1981
306. Isoyama S, Maruyama Y, Ashikawa K, Sato S, Suzuki H, Watanabe J, Shimizu Y, Ino-Oka E, Takishima T: Effects of afterload reduction on global left ventricular and regional myocardial functions in the isolated canine heart with stenosis of a coronary arterial branch. *Circulation* 67:139-147, 1983
307. Thomson IR, Mutch WAC, Culligan JD: Failure of intravenous nitroglycerin to prevent intraoperative myocardial ischemia during fentanyl-pancuronium anesthesia. *ANESTHESIOLOGY* 61:385-393, 1984
308. Nachlas MM, Abrams SJ, Goldberg MM: The influence of arteriosclerotic heart disease on surgical risk. *Am J Surg* 101:447-455, 1961
309. Neill WA, Exendine J, Phelps N, Anderson RP: Subendocardial ischemia provoked by tachycardia in conscious dogs with coronary stenosis. *Am J Cardiol* 35:30-36, 1975
310. O'Riordan JB, Flaherty JT, Khuri SF, Brawley RK, Pitt B, Gott VL: Effects of atrial pacing on regional myocardial gas tensions with critical coronary stenosis. *Am J Physiol* 232:H49-H53, 1977
311. Gross GJ, Lamping KG, Warltier DC, Hardman HF: Effects of three bradycardiac drugs on regional myocardial blood flow and function in areas distal to a total or partial coronary occlusion in dogs. *Circulation* 69:391-399, 1984
312. Breslow MJ, Miller CG, Parker SD, Walman AT, Rogers MC: Changes in T-wave morphology following anesthesia and surgery: A common recovery-room phenomenon. *ANESTHESIOLOGY* 64:398-402, 1986
313. Slogoff S, Keats AS: Further observations on perioperative myocardial ischemia. *ANESTHESIOLOGY* 65:539-542, 1986
314. Tennant R, Wiggers CJ: The effect of coronary occlusion on myocardial contraction. *Am J Physiol* 112:351-361, 1935
315. Hauser AM, Gangadharan V, Ramos RG, Gordon S, Timmis GC, Dudlets P: Sequence of mechanical, electrocardiographic and clinical effects of repeated coronary artery occlusion in human beings: Echocardiographic observations during coronary angioplasty. *J Am Coll Cardiol* 5:193-197, 1985
316. Wohlgeleitner D, Cleman M, Highman HA, Fetterman RC, Duncan JS, Zaret BL, Jaffe CC: Regional myocardial dysfunction during coronary angioplasty: Evaluation by two-dimensional echocardiography and 12 lead electrocardiography. *J Am Coll Cardiol* 7:1245-1254, 1986
317. Topol EJ, Weiss JL, Guzman PA, Dorsey-Lima S, Blanck TJJ, Humphrey LS, Baumgartner WA, Flaherty JT, Reitz BA: Immediate improvement of dysfunctional myocardial segments after coronary revascularization: Detection by intraoperative transesophageal echocardiography. *J Am Coll Cardiol* 4:1123-1134, 1984
318. Malmborg RO: A clinical hemodynamic analysis of factors limiting the cardiac performance in patients with coronary heart disease. *Acta Med Scand* 177 (Suppl 426):1-94, 1965
319. Martin CM, McConahay DR: Maximal treadmill exercise electrocardiography. Correlations with coronary arteriography and cardiac hemodynamics. *Circulation* 46:956-962, 1972
320. Moir TW, DeBra DW: Effect of left ventricular hypertension, ischemia and vasoactive drugs on the myocardial distribution of coronary flow. *Circ Res* 21:65-74, 1967
321. Benchemol A, Maroko PR, Pedraza A, Brenner L, Buxbaum A: Left ventricular end diastolic pressure and cardiac output at rest and during exercise in patients with angina pectoris. *Cardiology* 53:261-279, 1968
322. Parker JO, Chiong MA, West RO, Case RB: Sequential alterations in myocardial lactate metabolism, ST-segments and left ventricular function during angina induced by atrial pacing. *Circulation* 40:113-131, 1969
323. Parker JO, West RO, Case RB, Chiong MA: Temporal relationships of myocardial lactate metabolism, left ventricular function, and ST-segment depression during angina precipitated by exercise. *Circulation* 40:97-111, 1969
324. Rahimtoola SH, Loeb HS, Ehsani A, Sinno MZ, Chuquimia R, Lal R, Rosen KM, Gunnar RM: Relationship of pulmonary artery to left ventricular diastolic pressures in acute myocardial infarction. *Circulation* 46:283-290, 1972
325. Kleinman B, Henkin RE, Glisson SN, El-Etr AA, Bakhos M, Sullivan HJ, Montoya A, Pifarre R: Qualitative evaluation of coronary flow during anesthetic induction using thallium-201 perfusion scans. *ANESTHESIOLOGY* 64:157-164, 1986
326. Giles RW, Berger HJ, Barash PG, Tarabaskar S, Marx PG, Hammond GL, Geha AS, Laks H, Zaret BL: Continuous monitoring of left ventricular performance with the computerized nuclear probe during laryngoscopy and intubation before coronary artery bypass surgery. *Am J Cardiol* 50:735-741, 1982
327. Gertz EW, Wisneski JA, Neese R, Houser A, Korte R, Bristow JD: Myocardial lactate extraction: Multi-determined metabolic function. *Circulation* 61:256-261, 1980
328. Gertz EW, Wisneski JA, Neese R, Bristow JD, Searle GL, Hanlon JT: Myocardial lactate metabolism: Evidence of lactate release during net chemical extraction in man. *Circulation* 63:1273-1279, 1981
329. Arieff AI, Gertz EW, Park R, Leach W, Lazarowitz VC: Lactic acidosis and the cardiovascular system in the dog. *Clin Sci* 64:573-580, 1983
330. Wisneski JA, Gertz EW, Neese RA, Gruenke LD, Craig JC: Dual

- carbon labeled isotope experiments using D-[6-<sup>14</sup>C glucose] and L-[1,2,3-<sup>13</sup>C<sub>3</sub> lactate]: A new approach for investigating human myocardial metabolism during ischemia. *J Am Coll Cardiol* 5: 1138-1146, 1985
331. Whittemore AD, Clowes AWE, Hechtman HB, Mannick JA: Aortic aneurysm repair: Reduced operative mortality associated with maintenance of optimal cardiac performance. *Ann Surg* 192:414-419, 1980
  332. Crawford ES, Walker HSJ, Saleh SA, Normann NA: Graft replacement in descending thoracic aorta: Results without bypass of shunting. *Surgery* 89:73-84, 1981
  333. Dodd RB, Sims WA, Bone DJ: Cardiac arrhythmias observed during anesthesia and surgery. *Surgery* 51:440-447, 1962
  334. Reinikainen M, Pöntinen P: On cardiac arrhythmias during anaesthesia and surgery. *Acta Med Scand* 180 (suppl 457):1-36, 1966
  335. Udelsman R, Norton JA, Jelenich SE, Goldstein DS, Linehan WM, Loriaux DL, Chrousos GP: Responses of the hypothalamic-pituitary-adrenal and renin-angiotensin axes and the sympathetic system during controlled surgical and anesthetic stress. *J Clin Endocrinol Metab* 64:986-994, 1987
  336. Rutberg H, Håkanson E, Anderberg B, Jorfeldt L, Mårtensson, Schildt B: Effects of the extradural administration of morphine, or bupivacaine, on the endocrine response to upper abdominal surgery. *Br J Anaesth* 56:233-237, 1984
  337. Eckenhoff JE, Kneale DH, Dripps RD: The incidence and etiology of postanesthetic excitement. *ANESTHESIOLOGY* 22:667-673, 1961
  338. Gal TJ, Cooperman LH: Hypertension in the immediate post-operative period. *Br J Anaesth* 47:70-74, 1975
  339. Katz JD, Croneau LH, Barash PG: Postoperative hypertension: A hazard of abrupt cessation of antihypertensive medication in the preoperative period. *Am Heart J* 92:79-80, 1976
  340. Wade JC, Larson CP Jr, Hickey RF, Ehrenfeld WK, Severinghaus JW: Effect of carotid endarterectomy on carotid chemoreceptor and baroreceptor function in man. *N Engl J Med* 282:823-829, 1970
  341. Goldman L: Supraventricular tachyarrhythmias in hospitalized adults after surgery. Clinical correlates in patients over 40 years of age after major noncardiac surgery. *Chest* 73:450-454, 1978
  342. Shields TW, Ujiki GT: Digitalization for prevention of arrhythmias following pulmonary surgery. *Surg Gynecol Obstet* 126: 743-746, 1968
  343. Philbin DM, Sullivan SF, Bowman FO Jr, Malm JR, Papper EM: Postoperative hypoxemia: Contribution of the cardiac output. *ANESTHESIOLOGY* 32:136-142, 1970
  344. Droste C, Roskamm H: Experimental pain measurement in patients with asymptomatic myocardial ischemia. *J Am Coll Cardiol* 3:940-945, 1983
  345. Glazier JJ, Chierchia S, Brown MJ, Maseri A: Importance of generalized defective perception of painful stimuli as a cause of silent myocardial ischemia in chronic stable angina pectoris. *Am J Cardiol* 58:667-672, 1986
  346. Cohn PF: Silent myocardial ischemia. *Ann Intern Med* 109:312-317, 1988
  347. Kannel WB, Abbott RD: Incidence and prognosis of unrecognized myocardial infarction: An update on the Framingham Study. *N Engl J Med* 311:1144-1147, 1984
  348. Zeldin RA: Assessing cardiac risk in patients who undergo non-cardiac surgical procedures. *Can J Surg* 27:402-404, 1984
  349. Raby KE, Goldman L, Creager MA, Cook EF, Weisberg MC, Whittemore AD, Selwyn AP: Correlation between preoperative ischemia and major cardiac events after peripheral vascular surgery. *N Engl J Med* 321:1296-1300, 1989
